# Supplementary material for: The Hydractinia cell atlas reveals cellular and molecular principles of cnidarian coloniality
Source: Springer Nature journal article supplement (doi:10.1038/s41467-025-57168-z), 2025-03-03

# Module Gametogenesis (black)

GO term

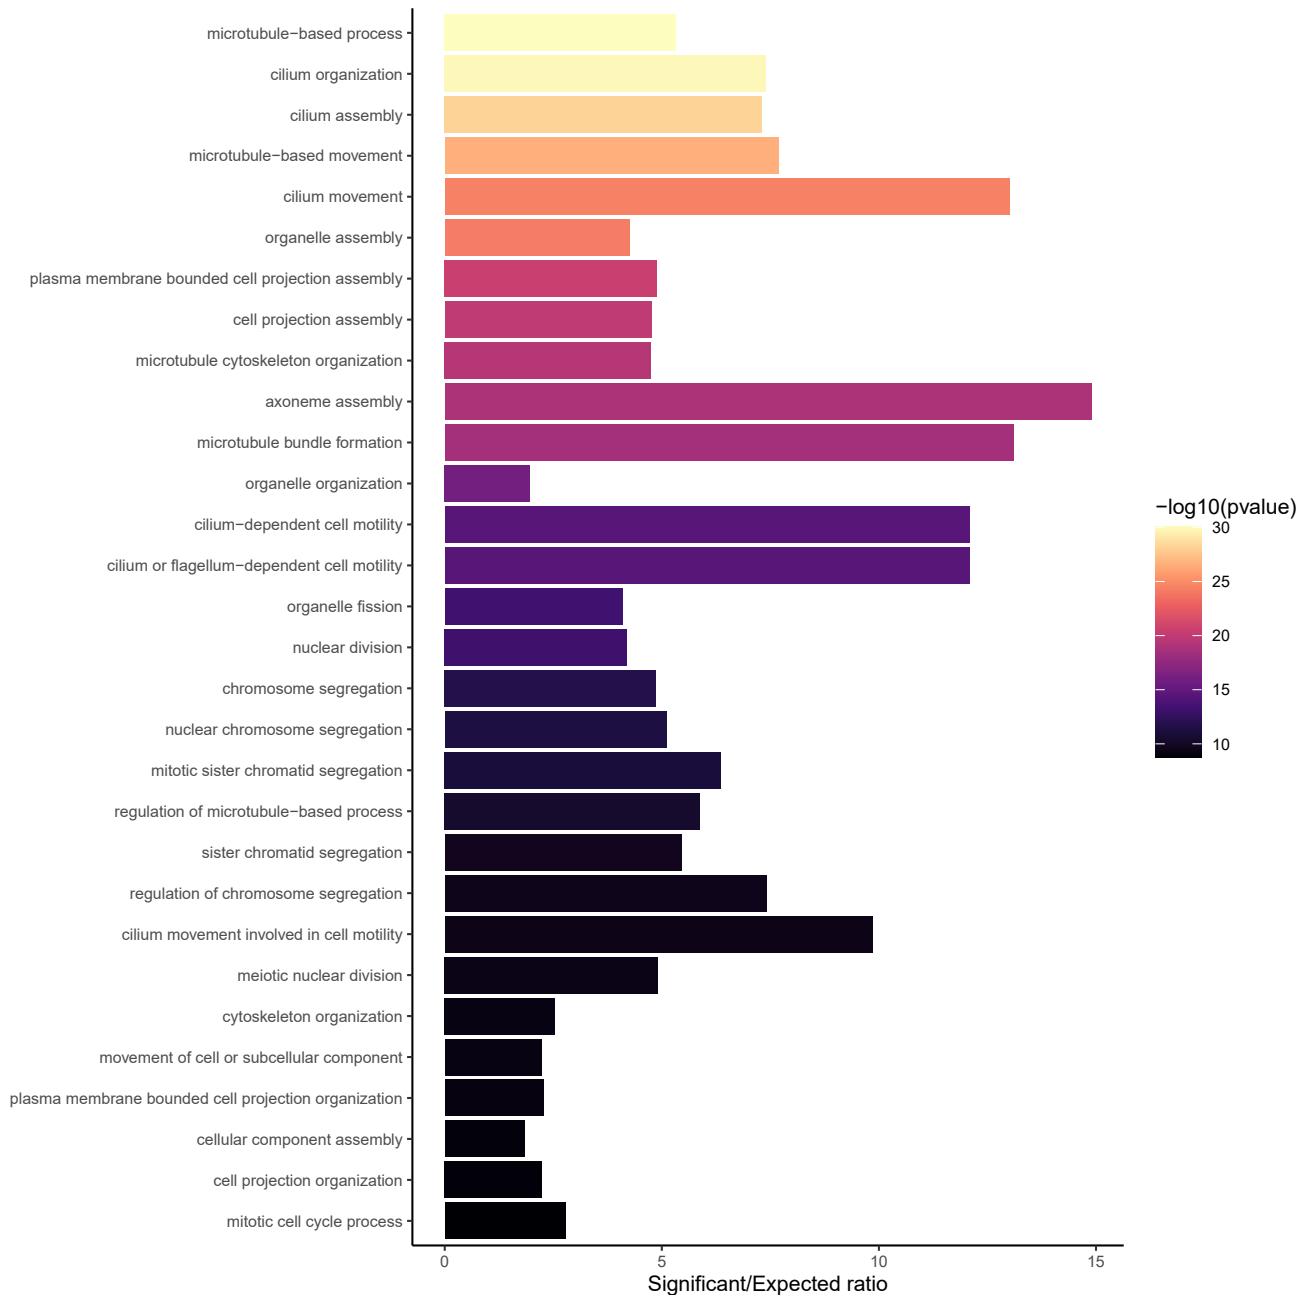

# Module Spermatogenesis (blue)

GO term

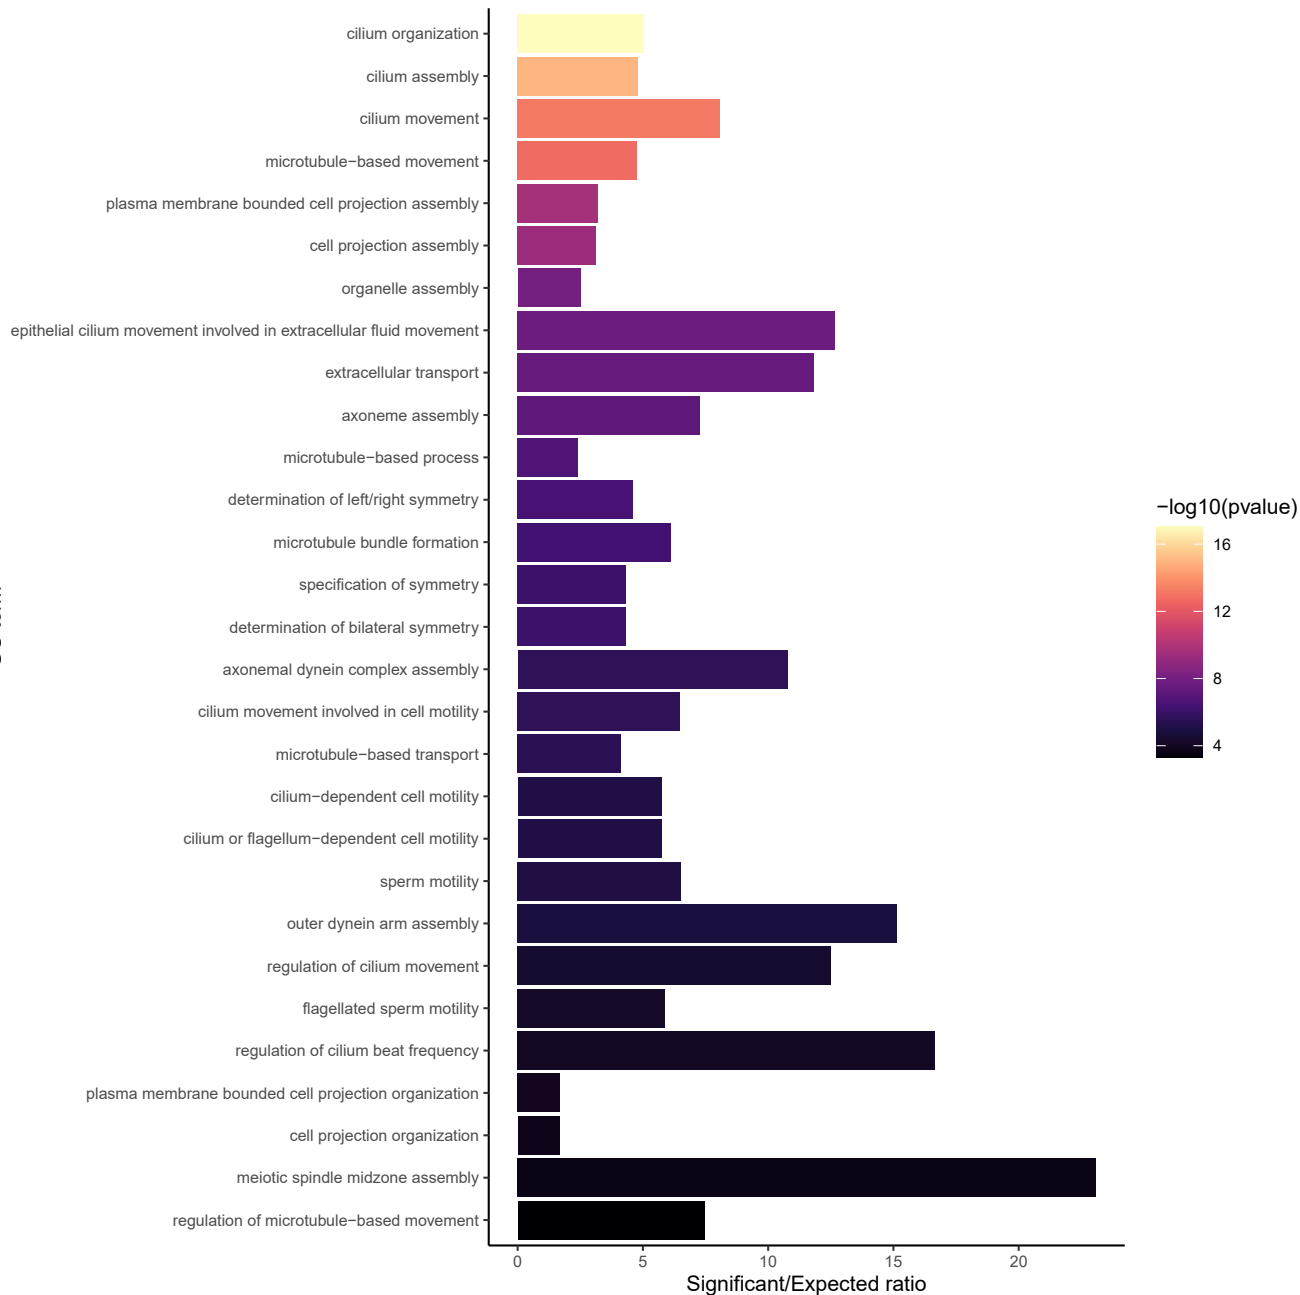

# Module Epithelial 4 (brown)

GO term

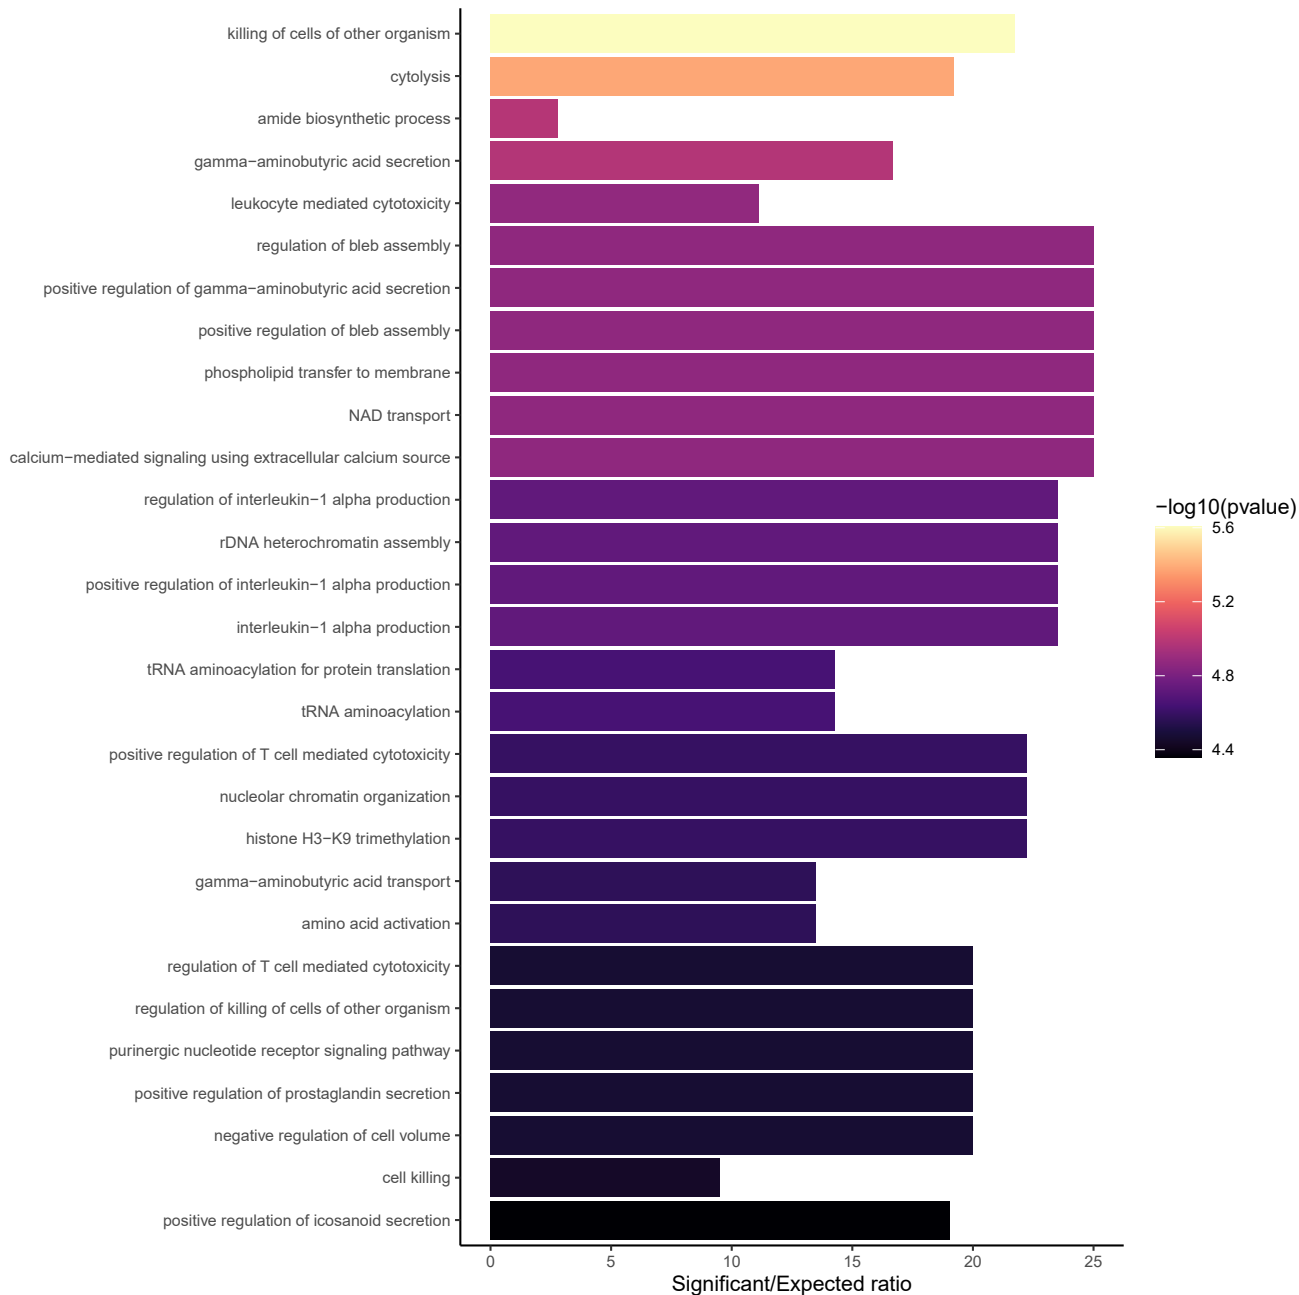

# Module Broad Epithelial 2 (cyan)

GO term

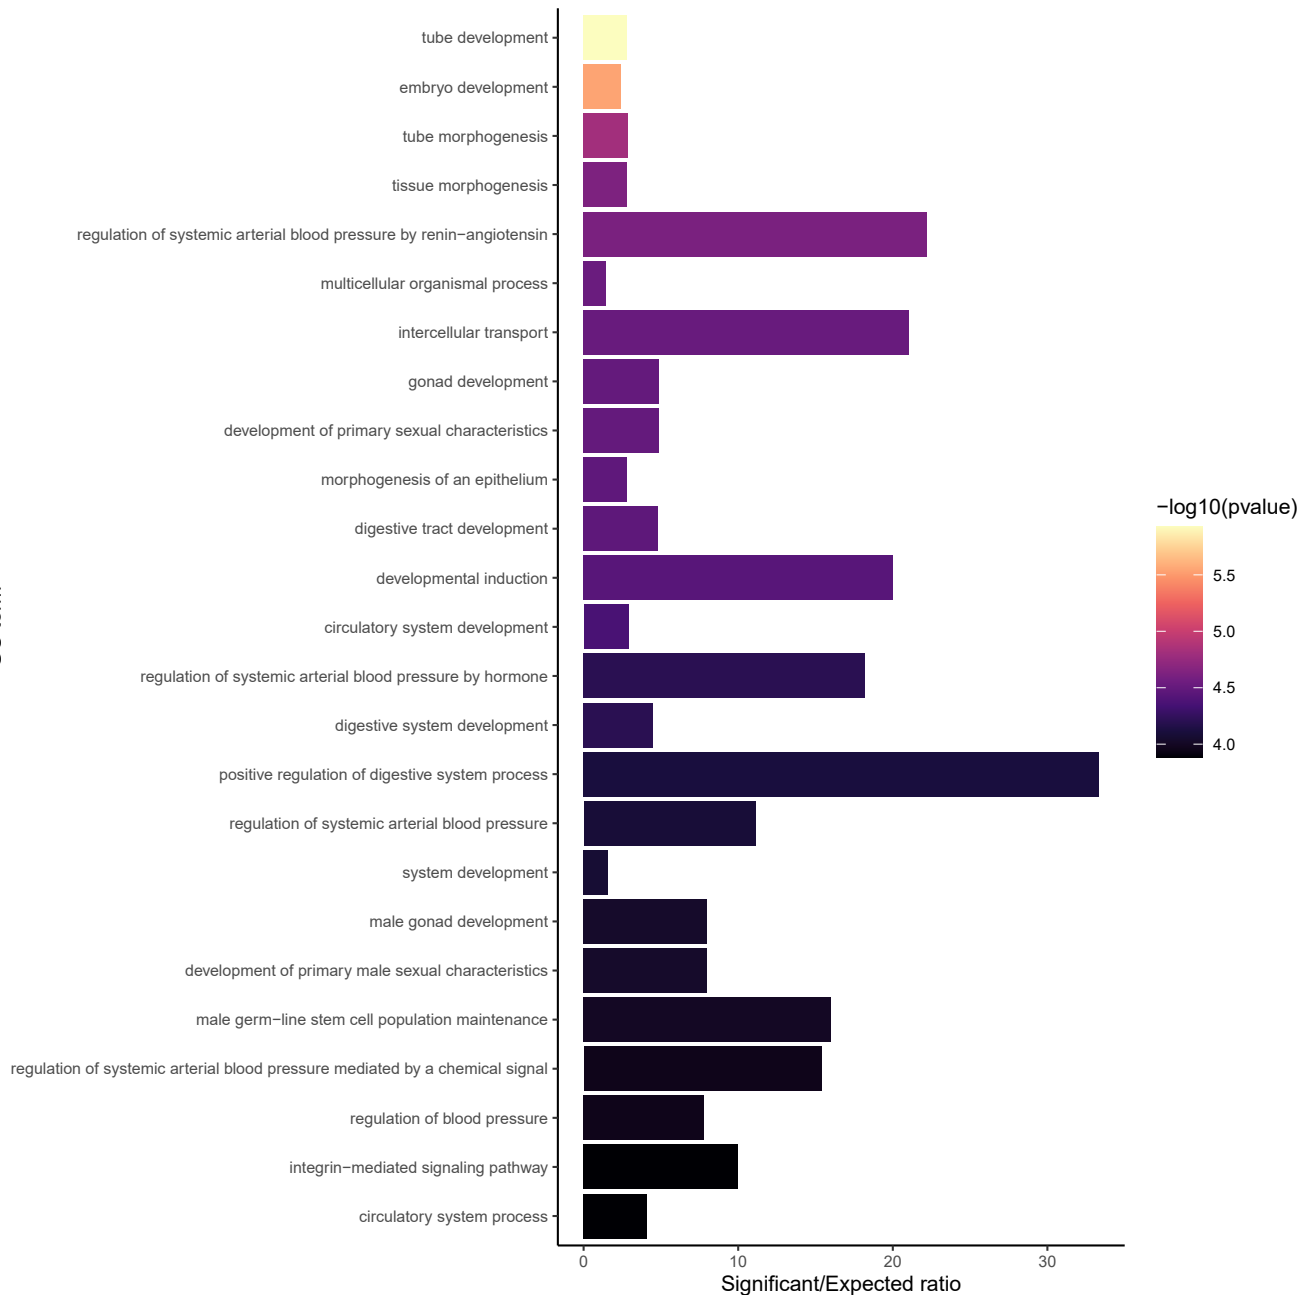

# Module Gland Rsp+ (darkgreen)

GO term

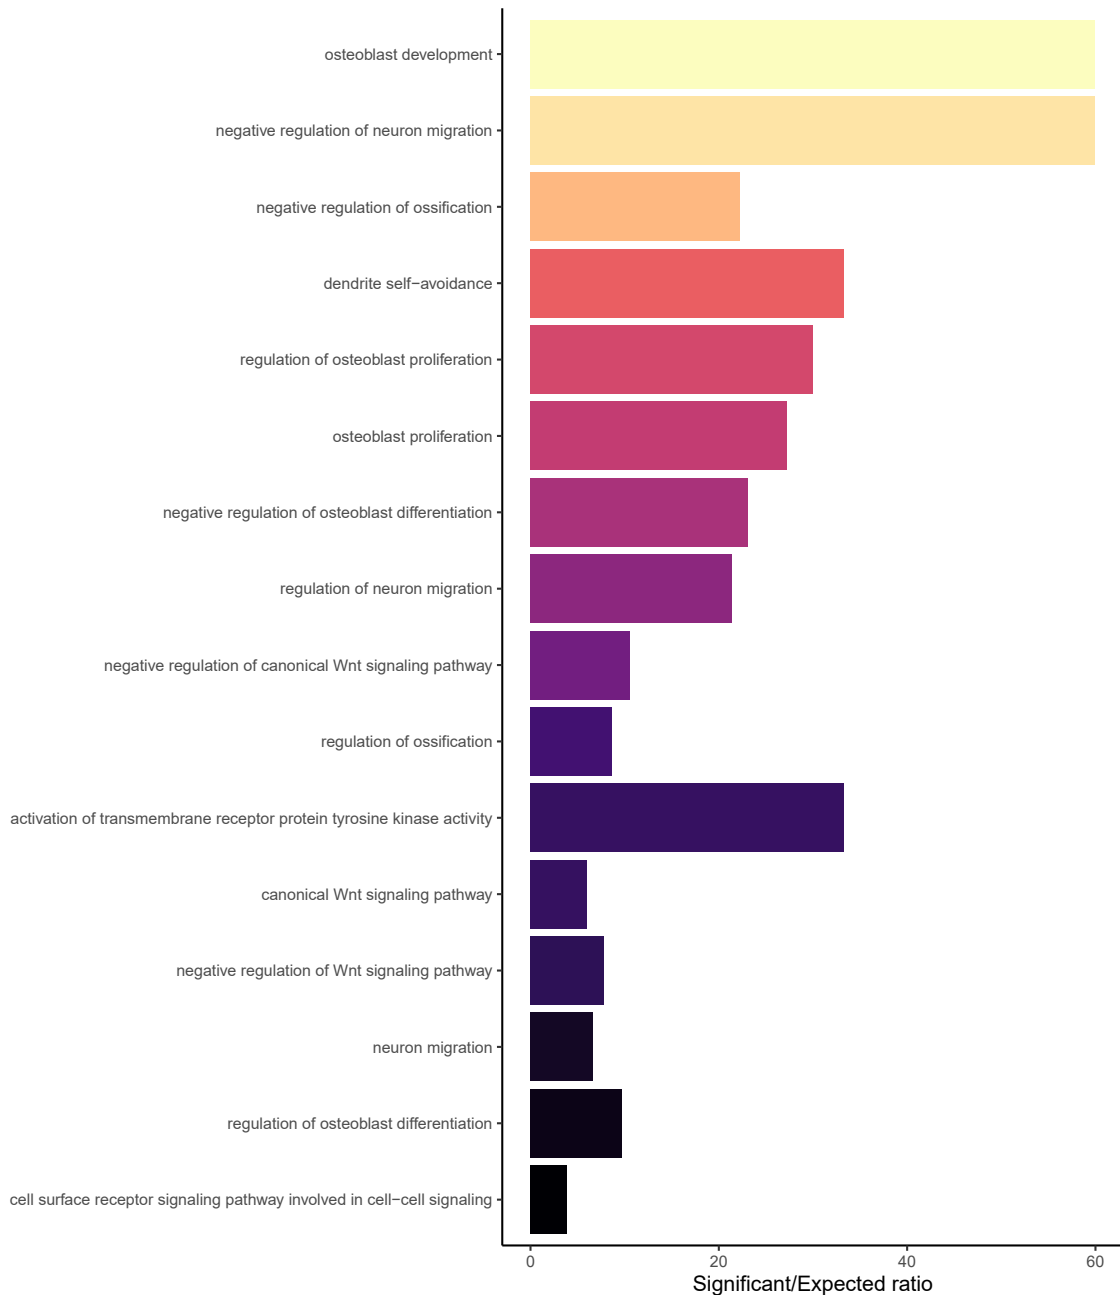

$-\log_{10}(\text{pvalue})$

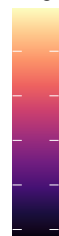

Significant/Expected ratio

# Module Late Nematoblasts (darkgrey)

GO term

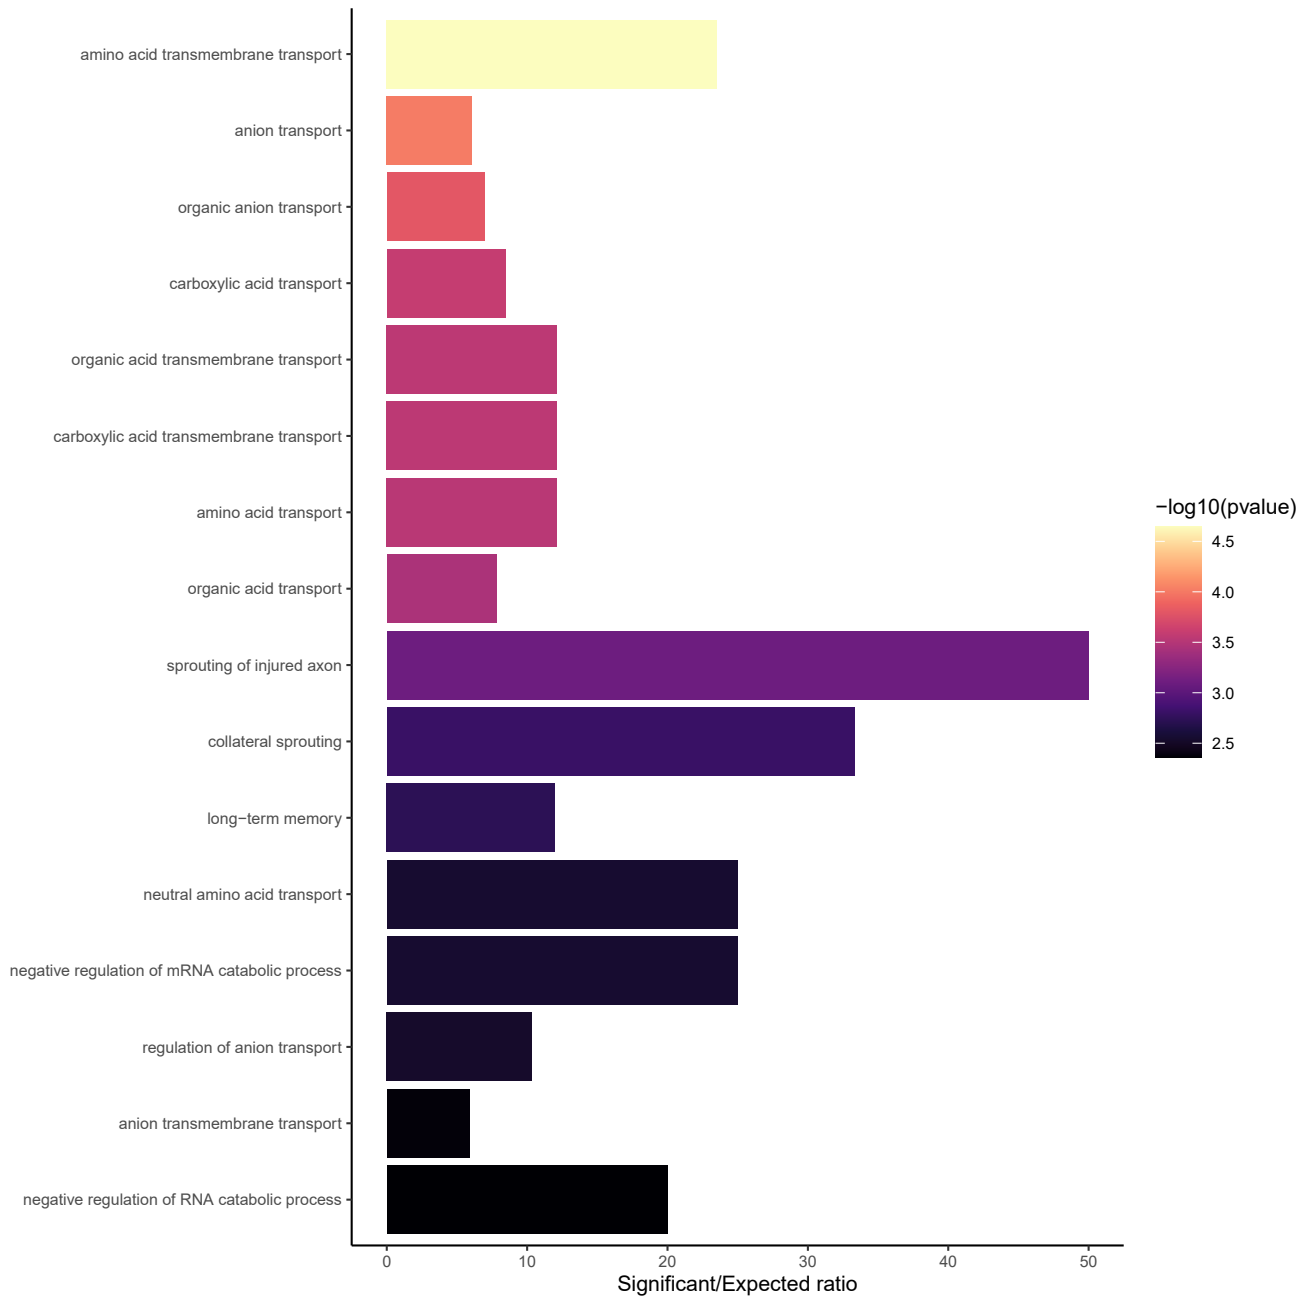

# Module Epitheliomuscular 2 (darkmagenta)

GO term

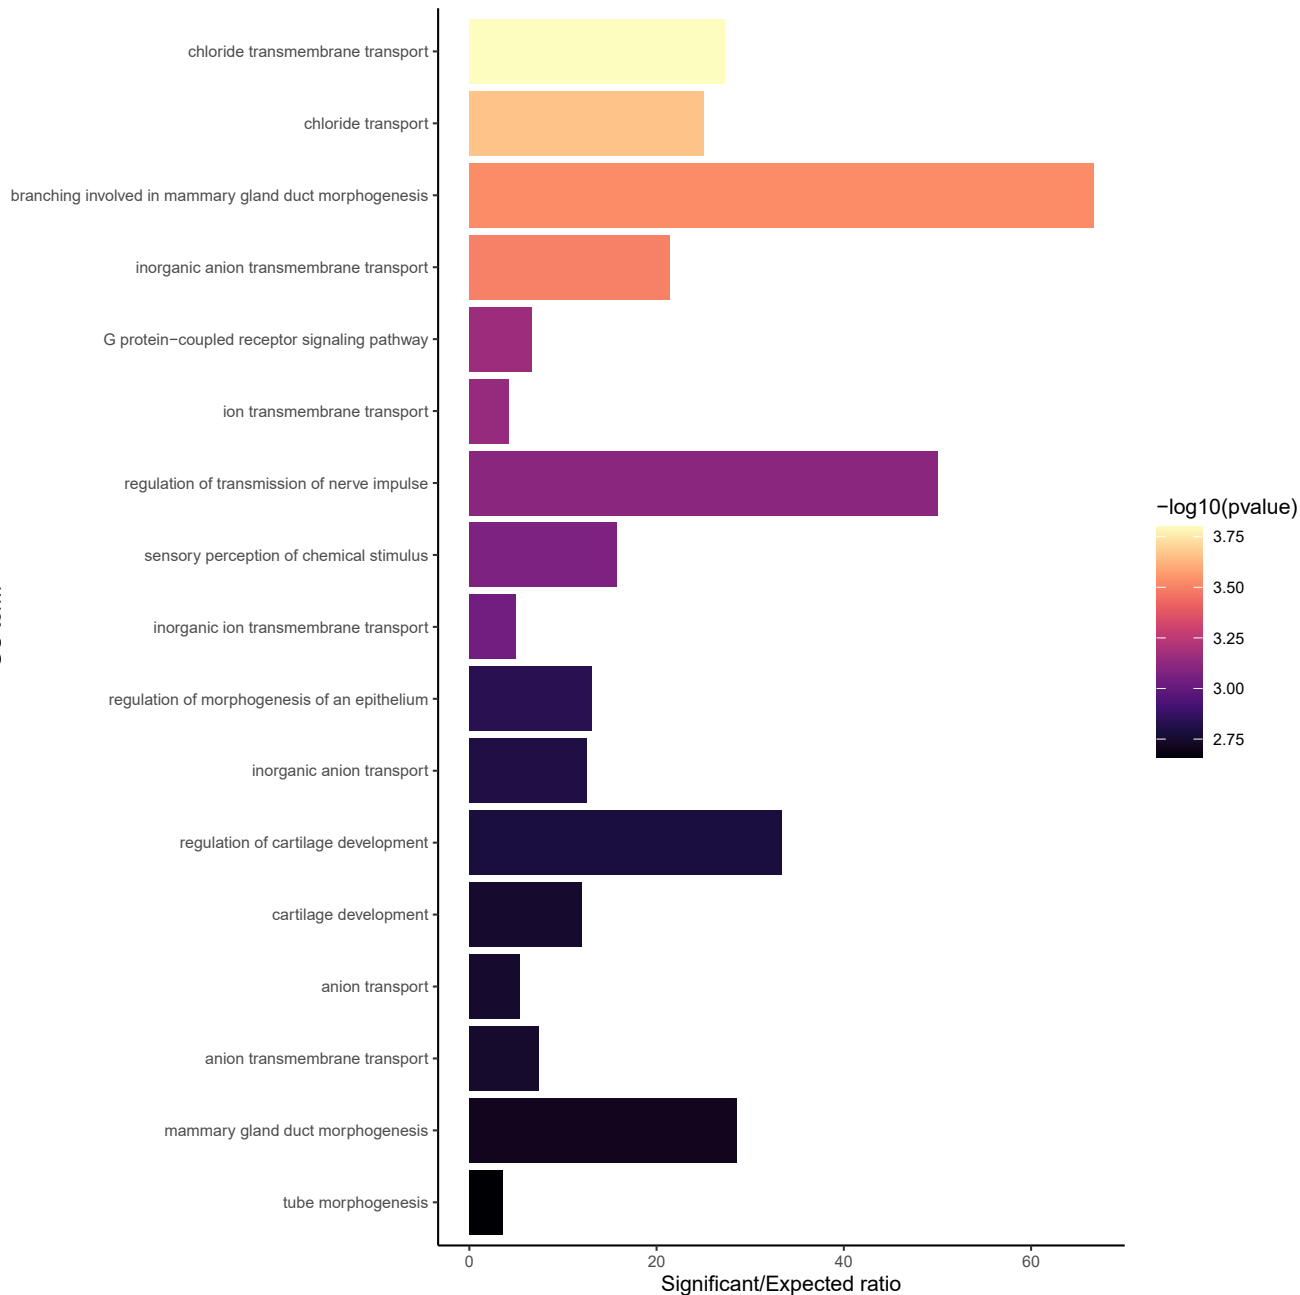

# Module Epithelial 9 (darkolivegreen)

GO term

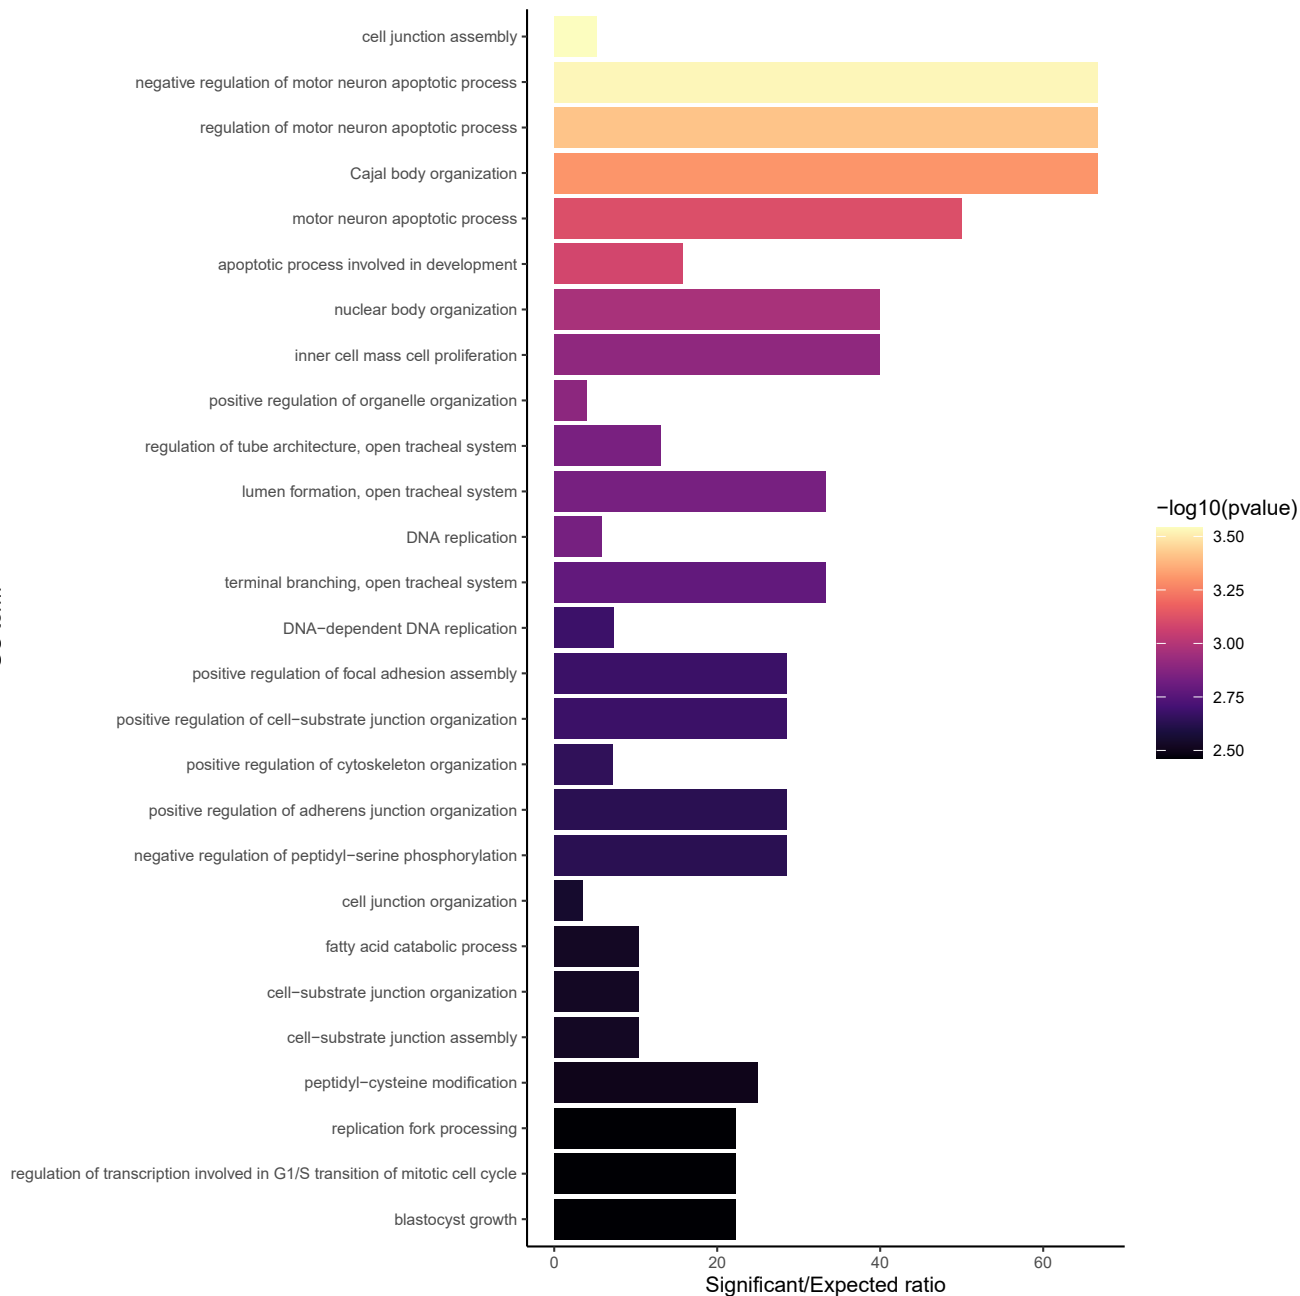

# Module Mixed Progenitors 2 (darkorange)

GO term

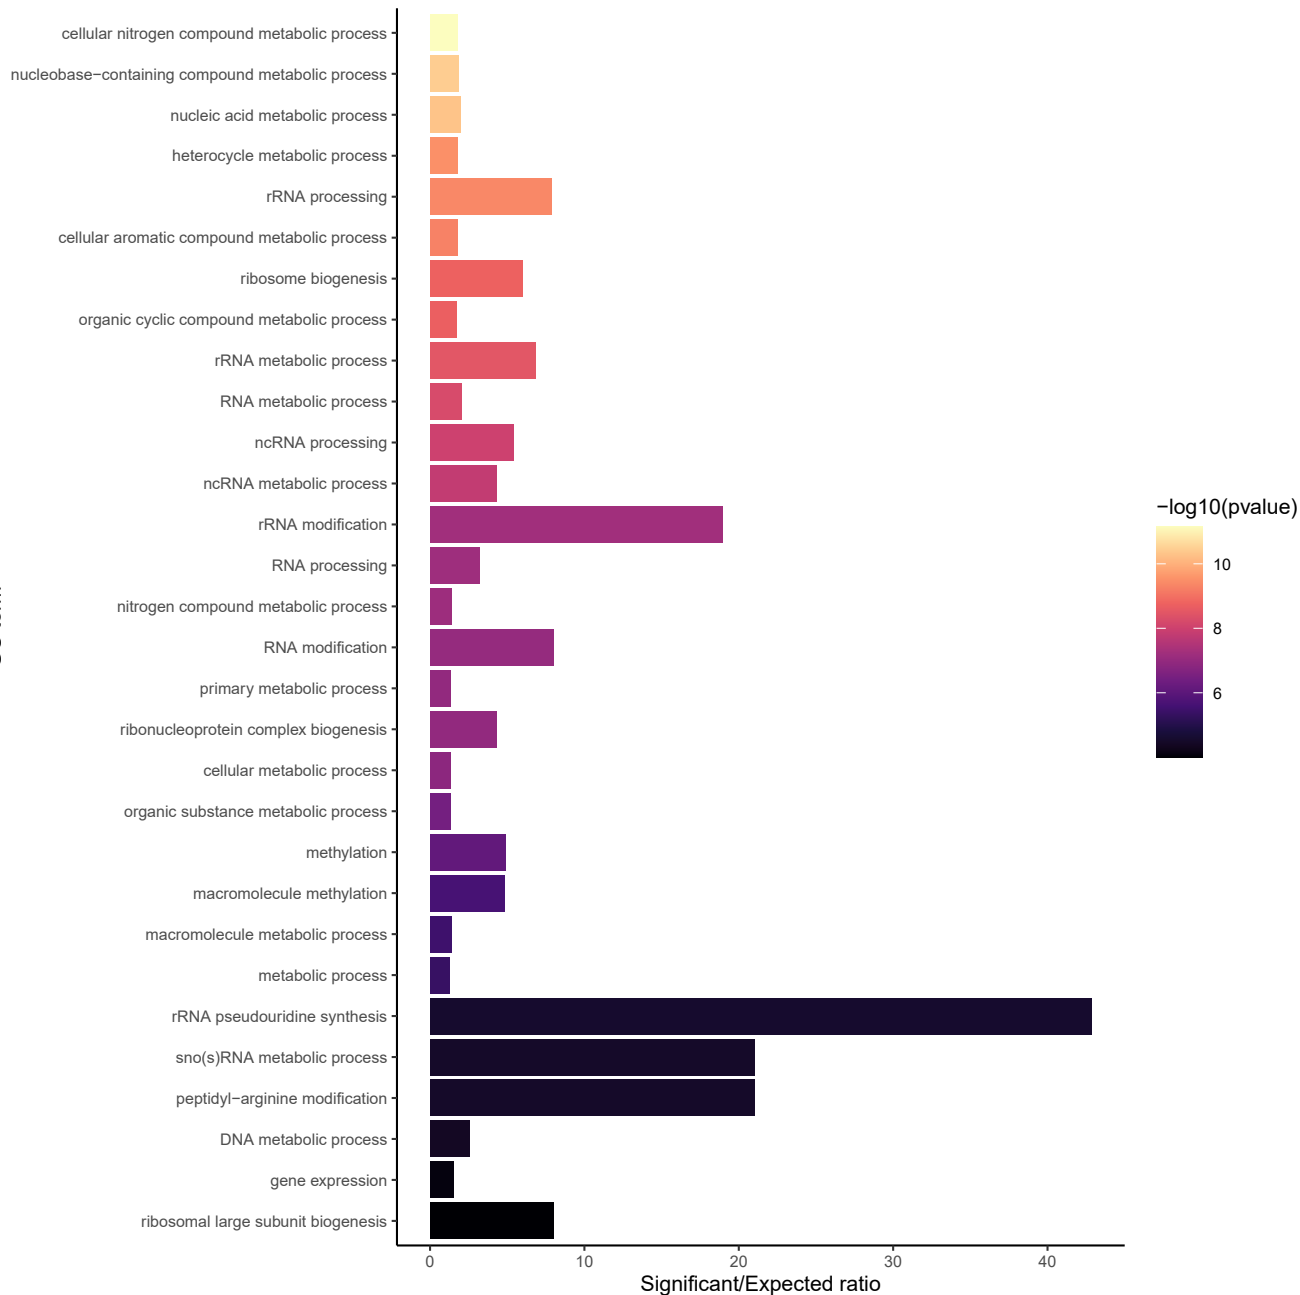

# Module Ar11+ (darkred)

GO term

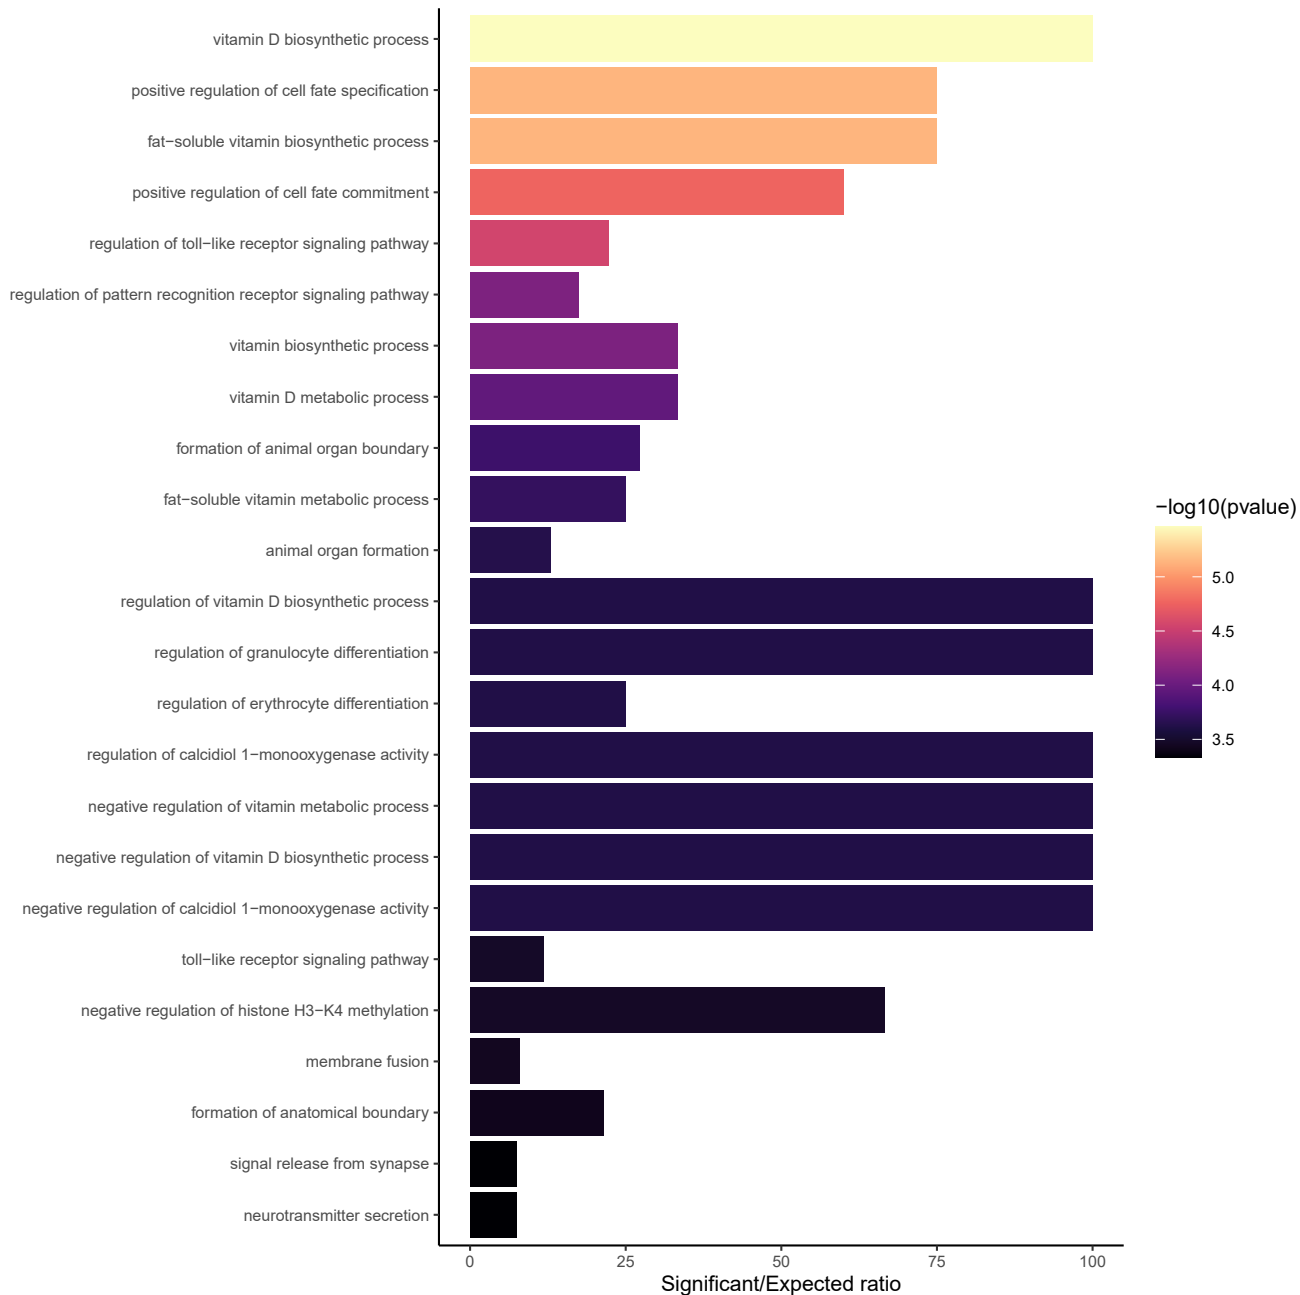

# Module Nematoblasts Hmr+ (darkturquoise)

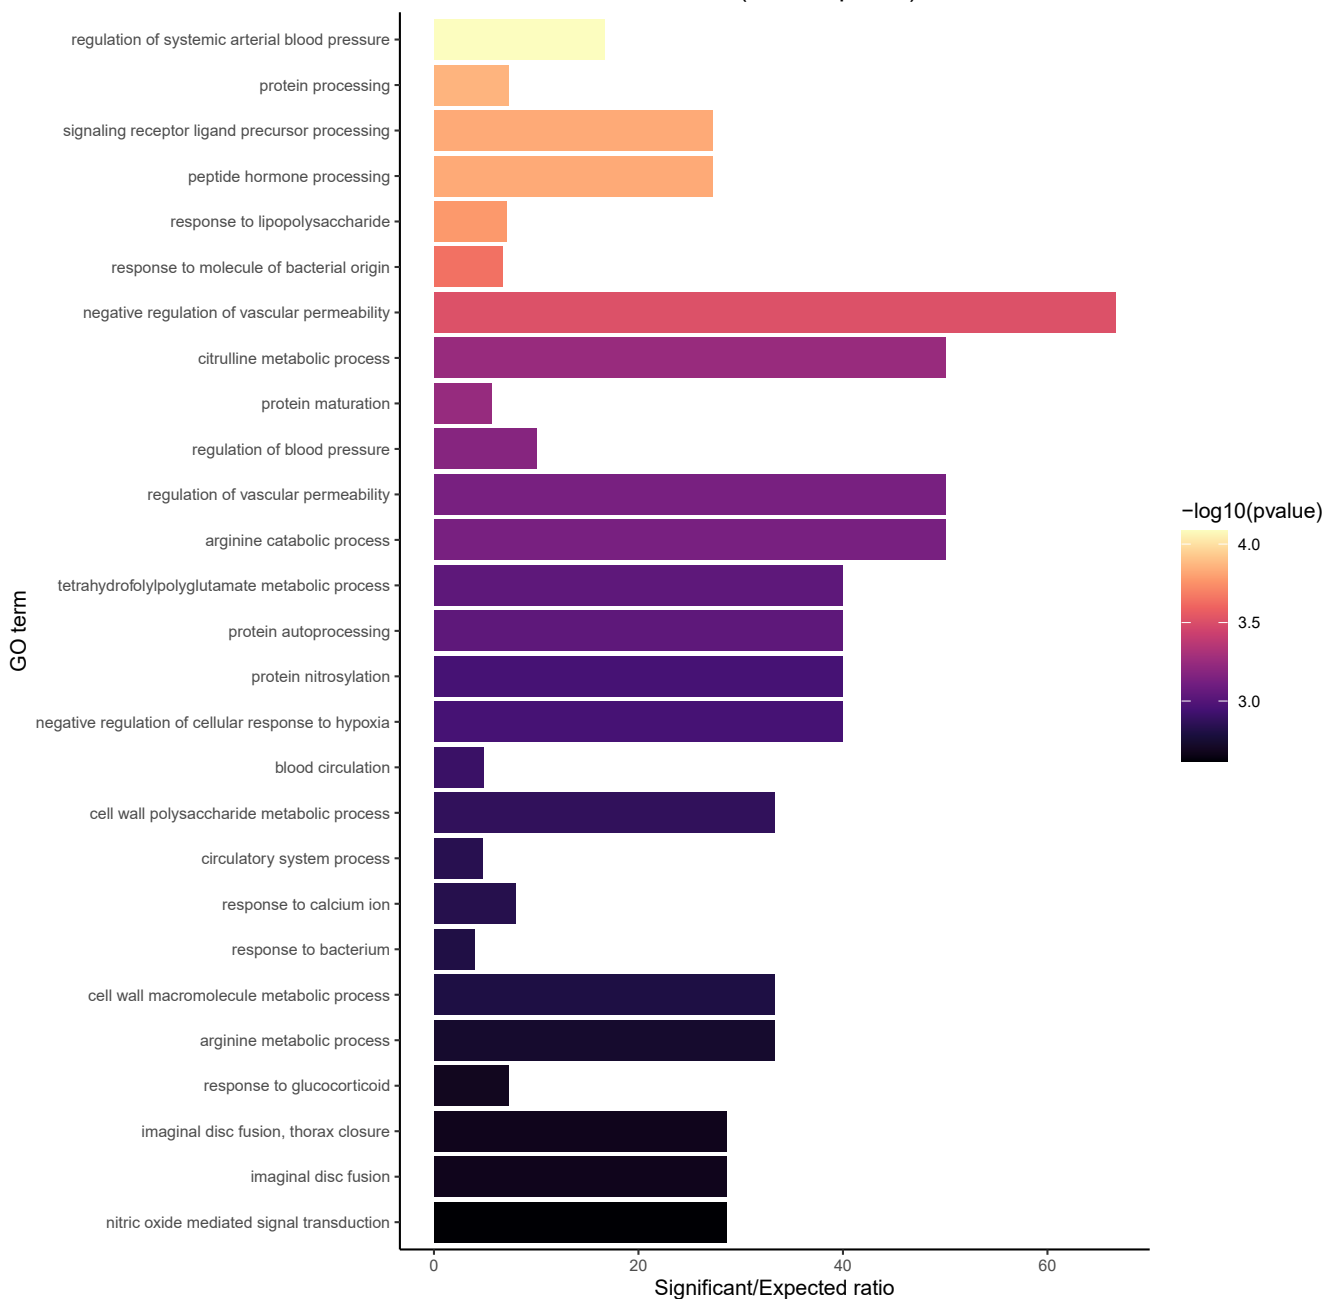

# Module Epitheliomuscular Prisilkin+ (green)

GO term

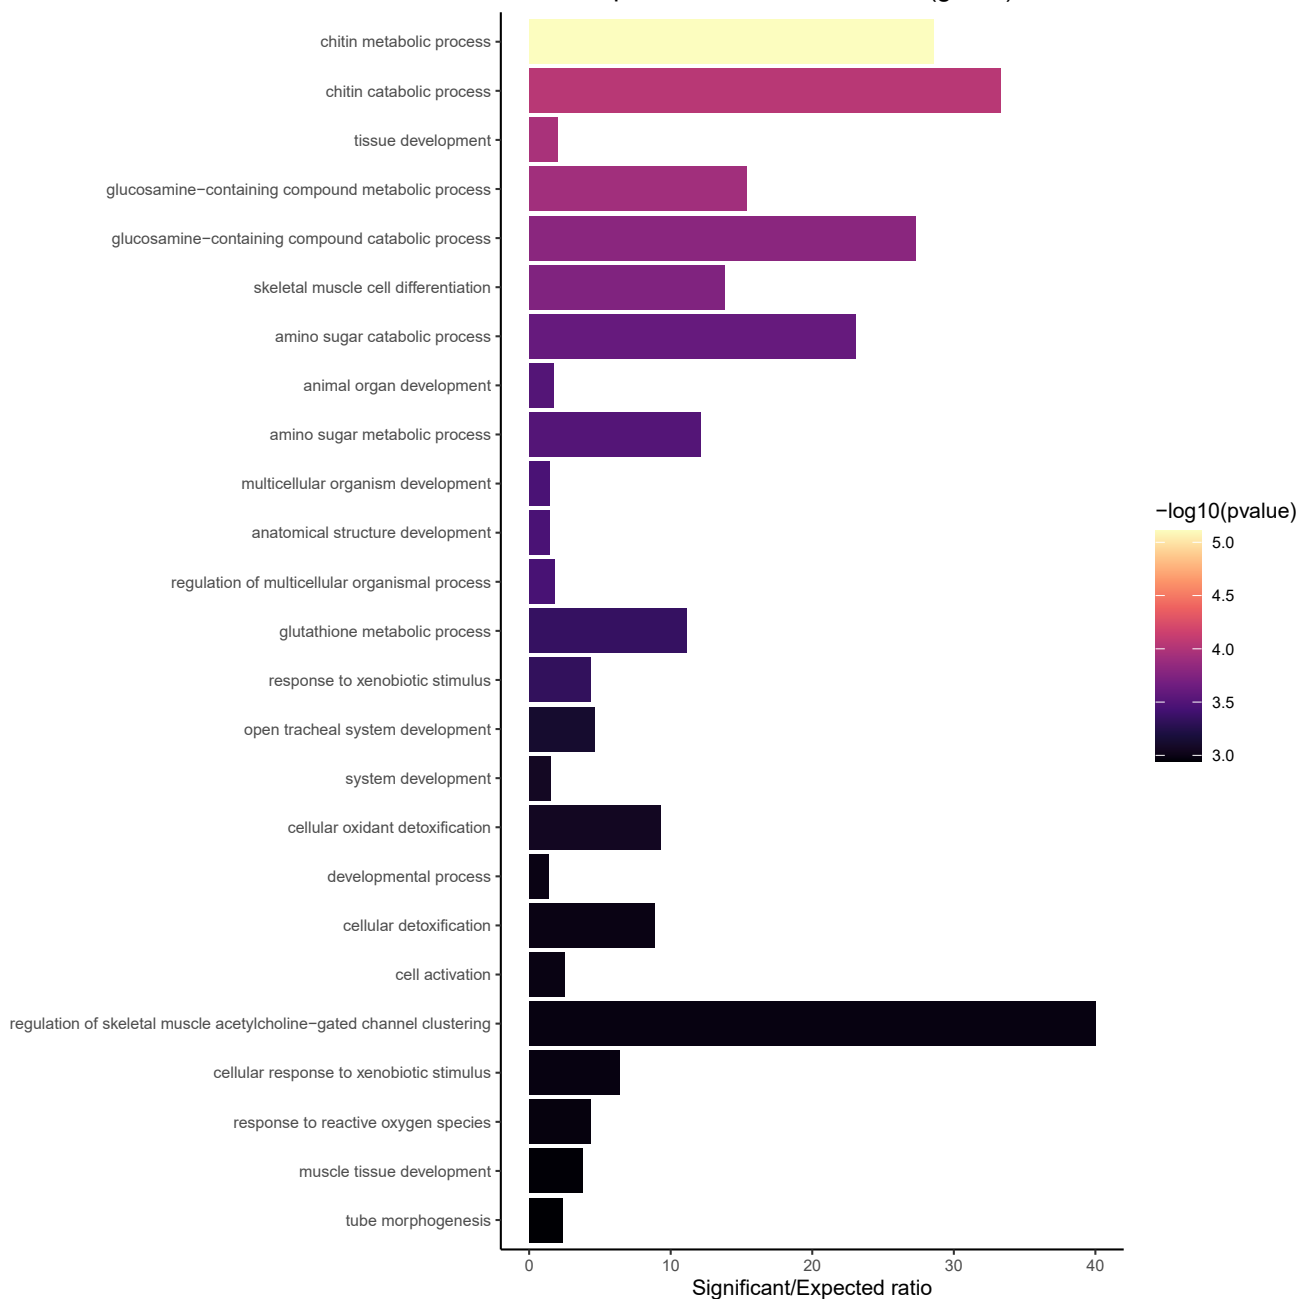

# Module Neuronal Pkdrej+ (greenyellow)

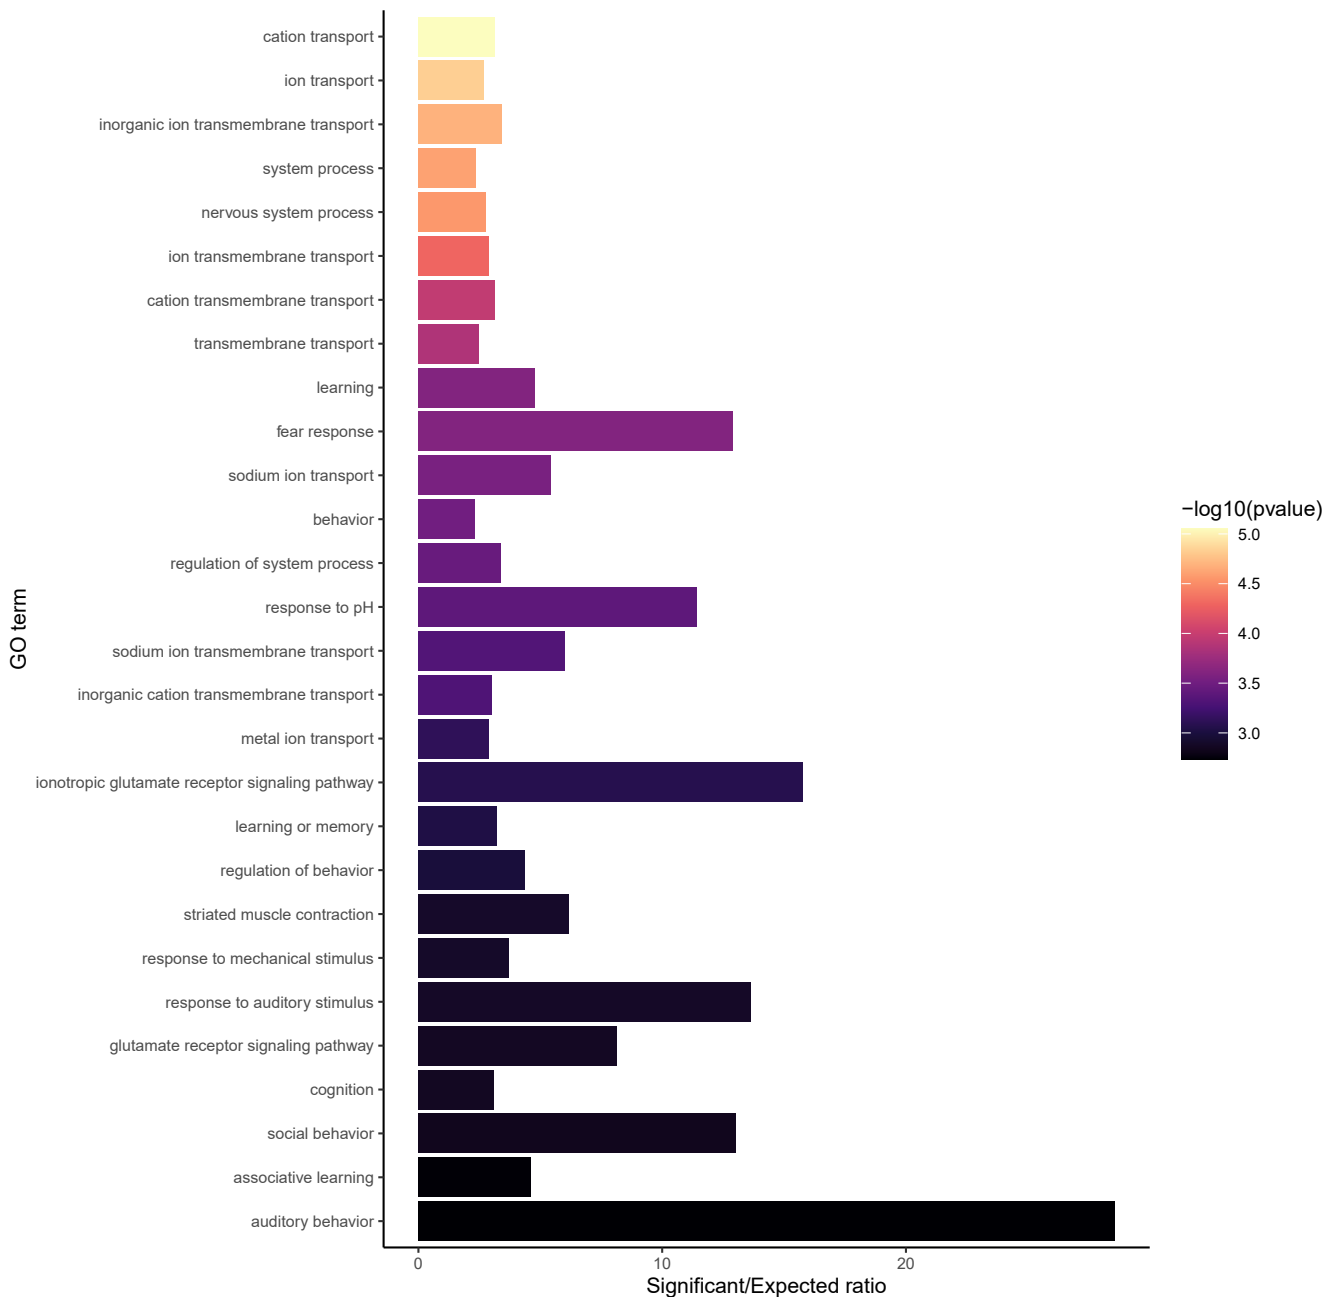

# Module Non-specific (grey)

GO term

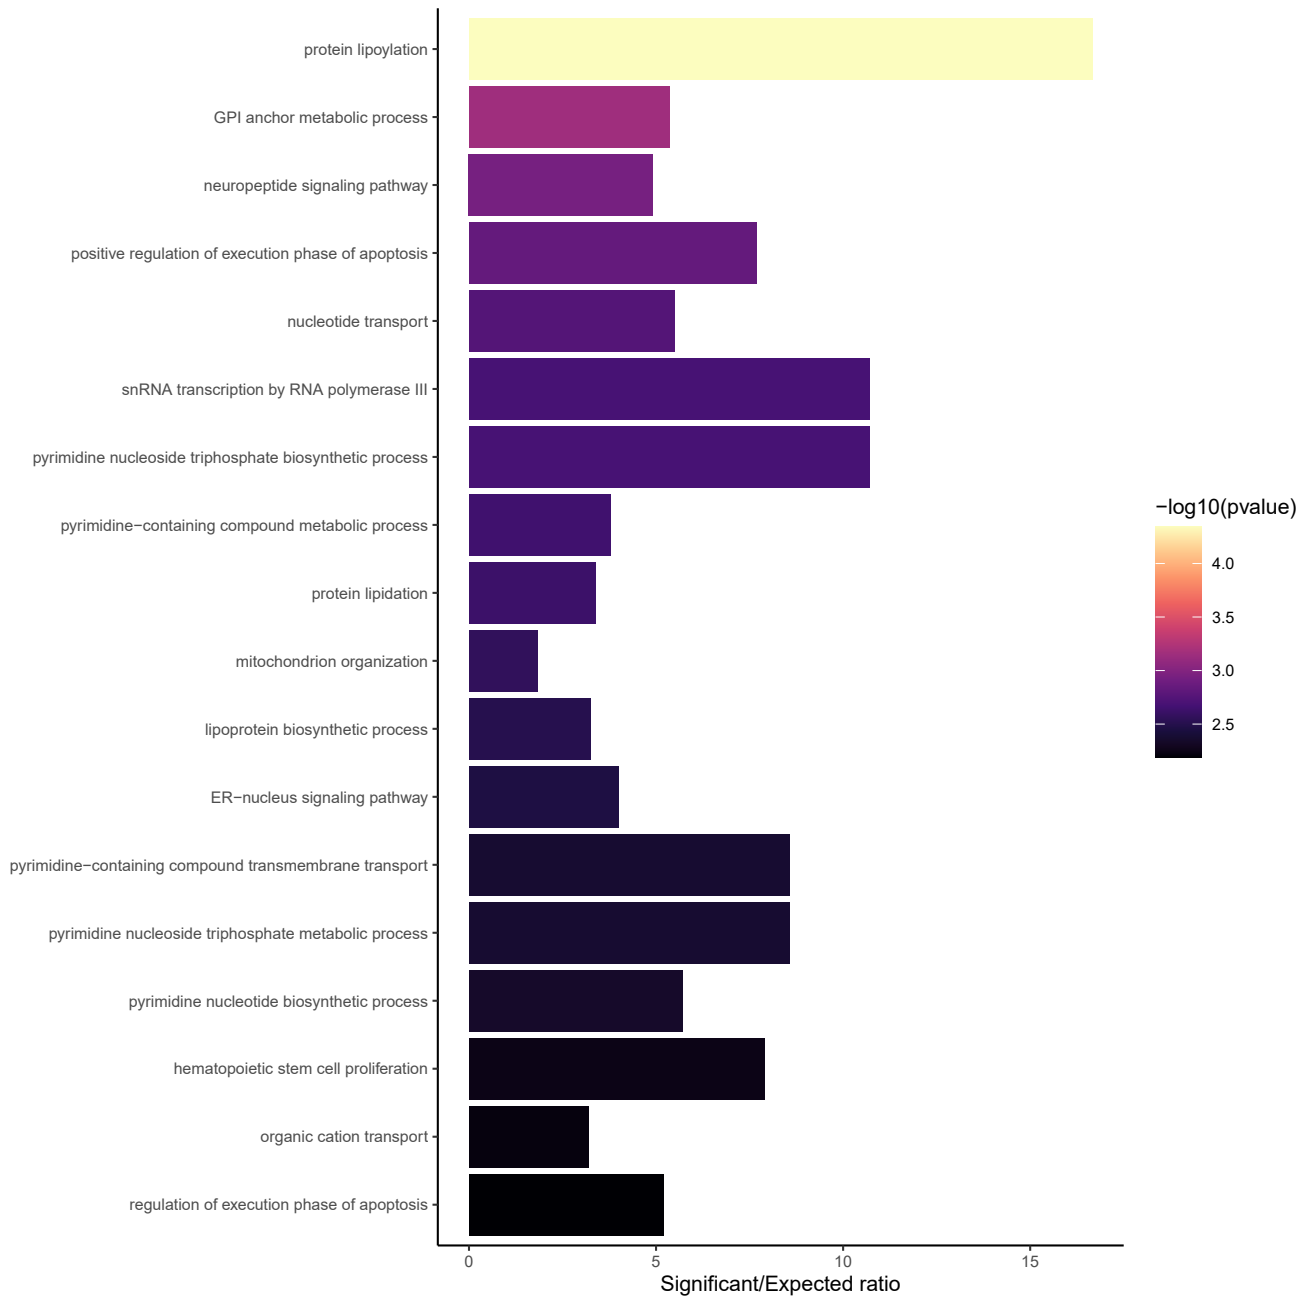

# Module Mixed Progenitors 3 (grey60)

GO term

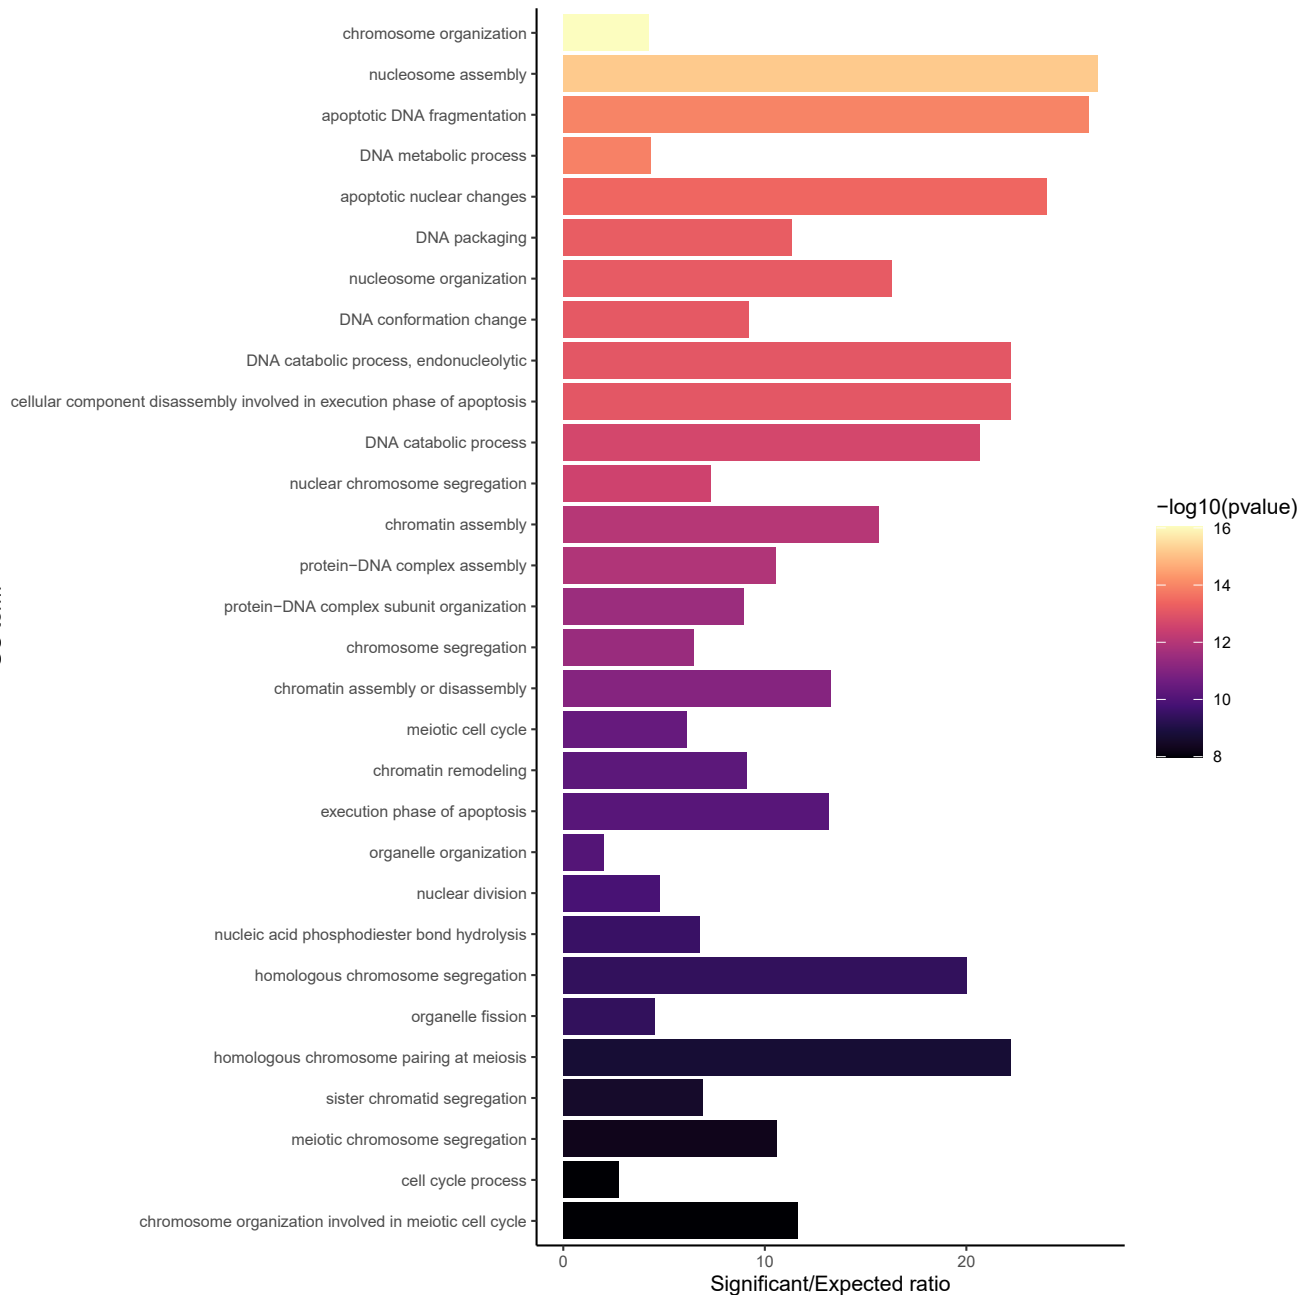

# Module Epithelial 3 (lightcyan)

GO term

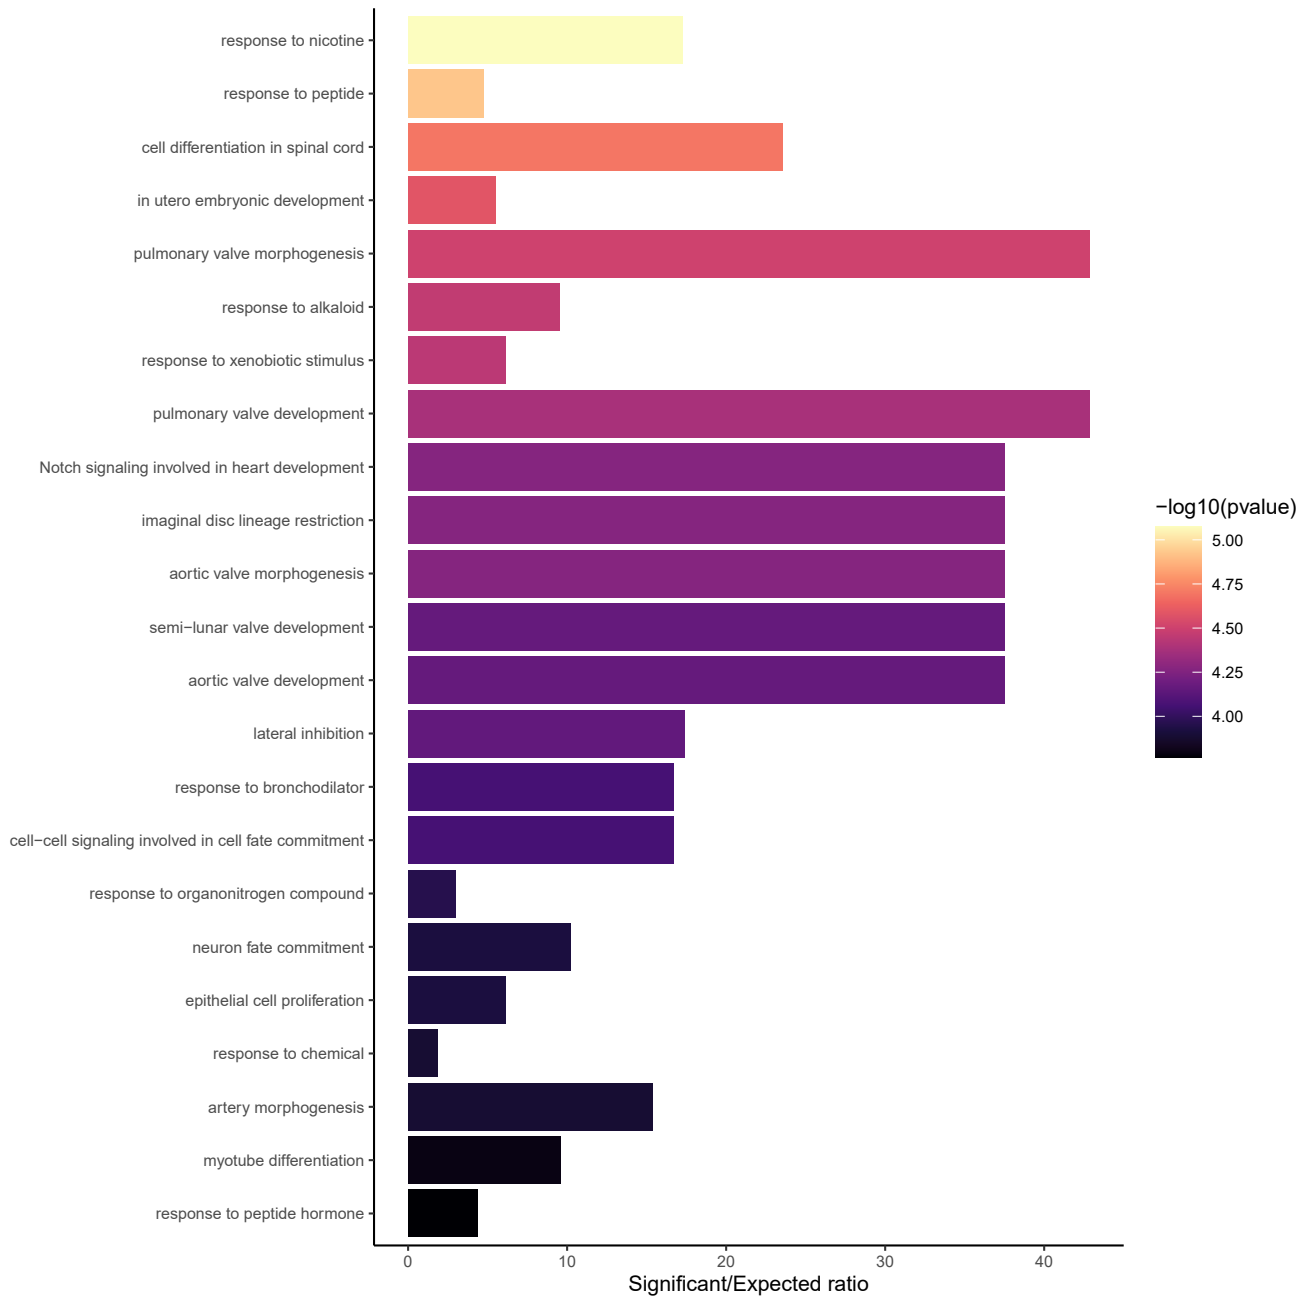

# Module Epitheliomuscular 4 (lightgreen)

GO term

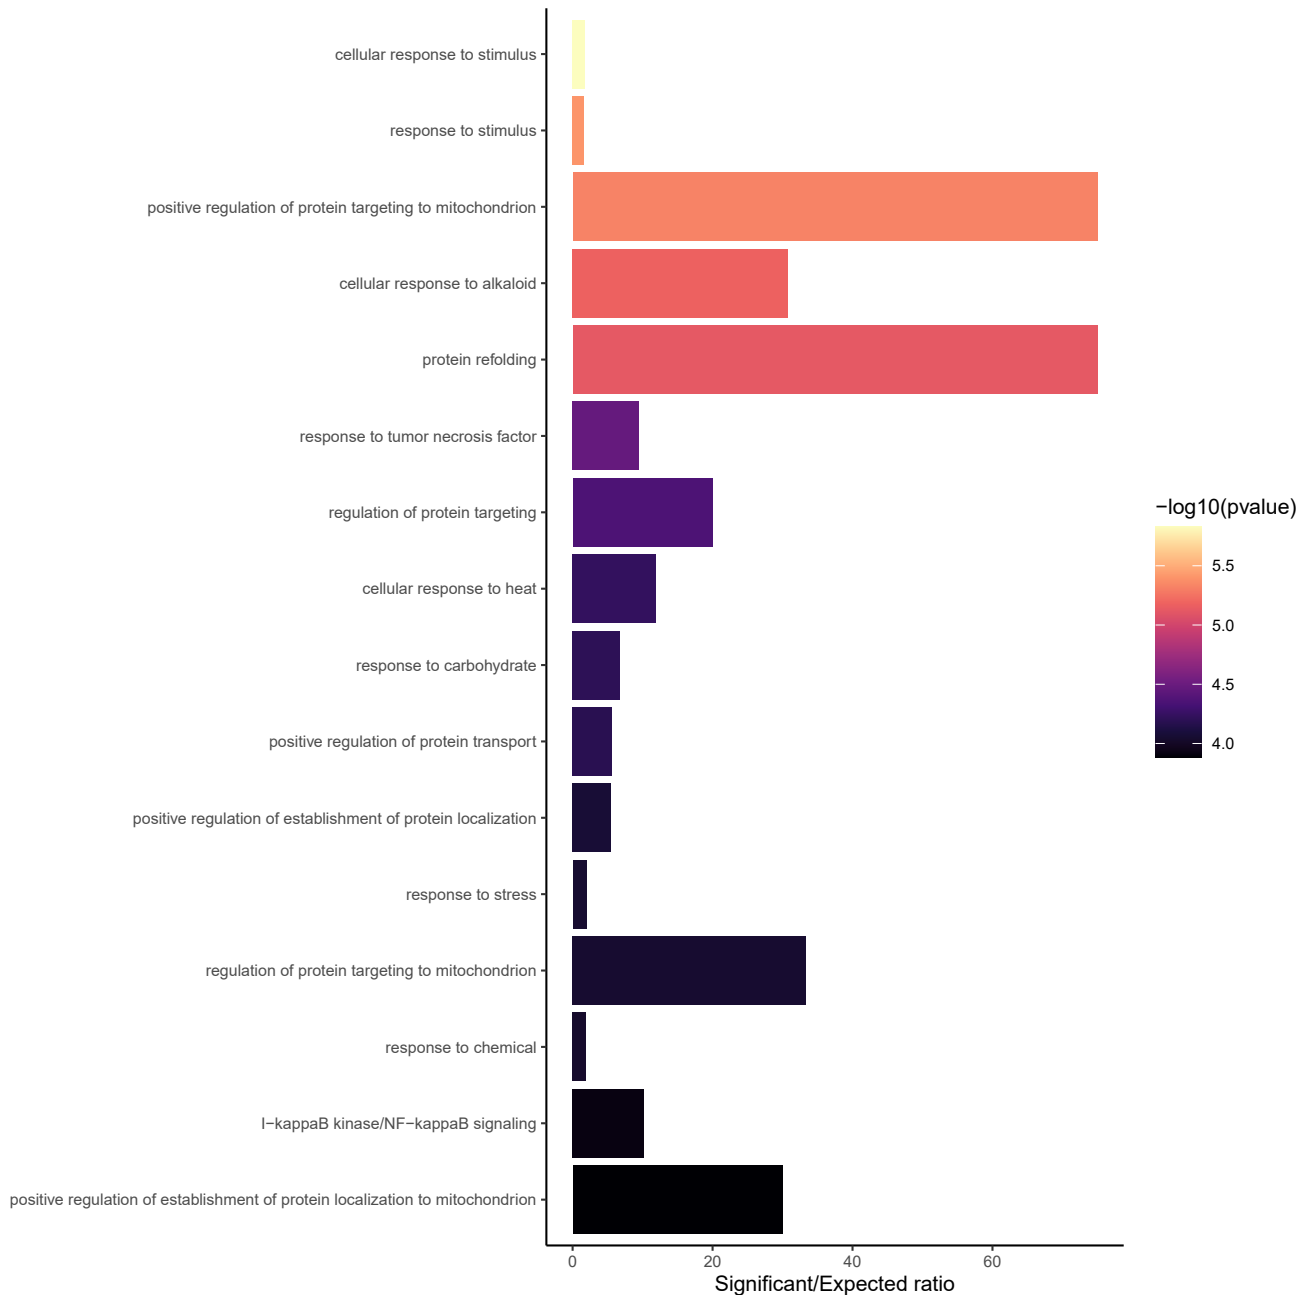

# Module Neuronal 4 (lightyellow)

GO term

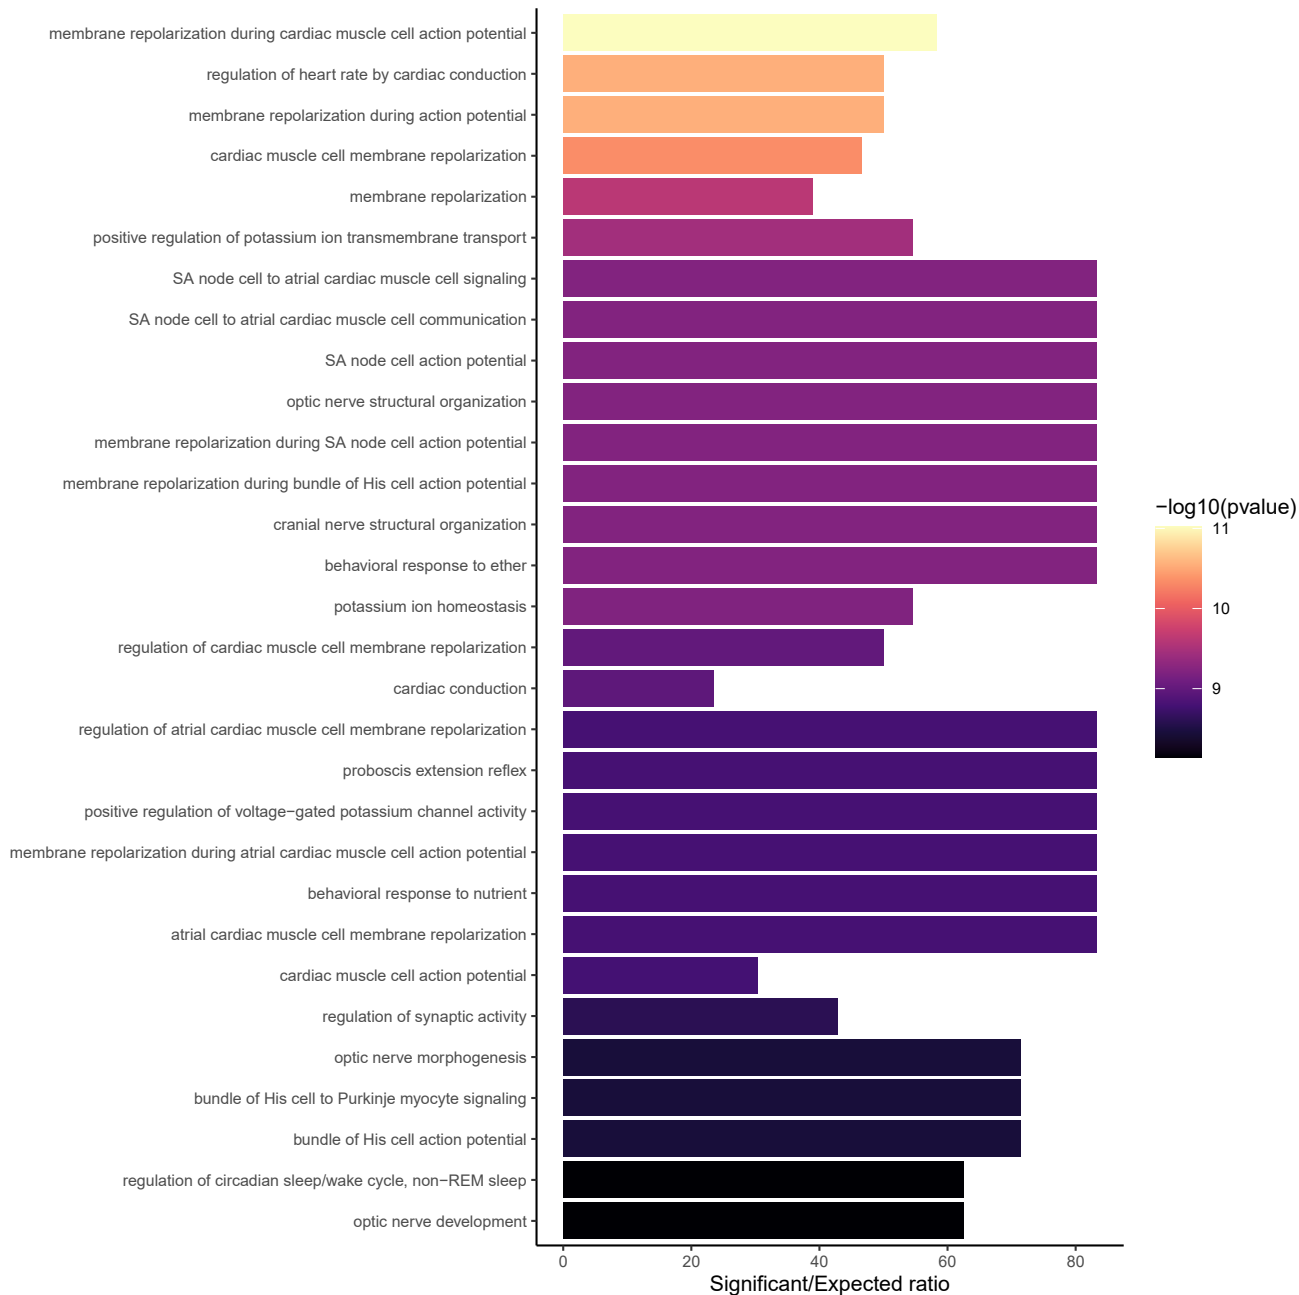

# Module Broad Epitheliomuscular 2 (magenta)

GO term

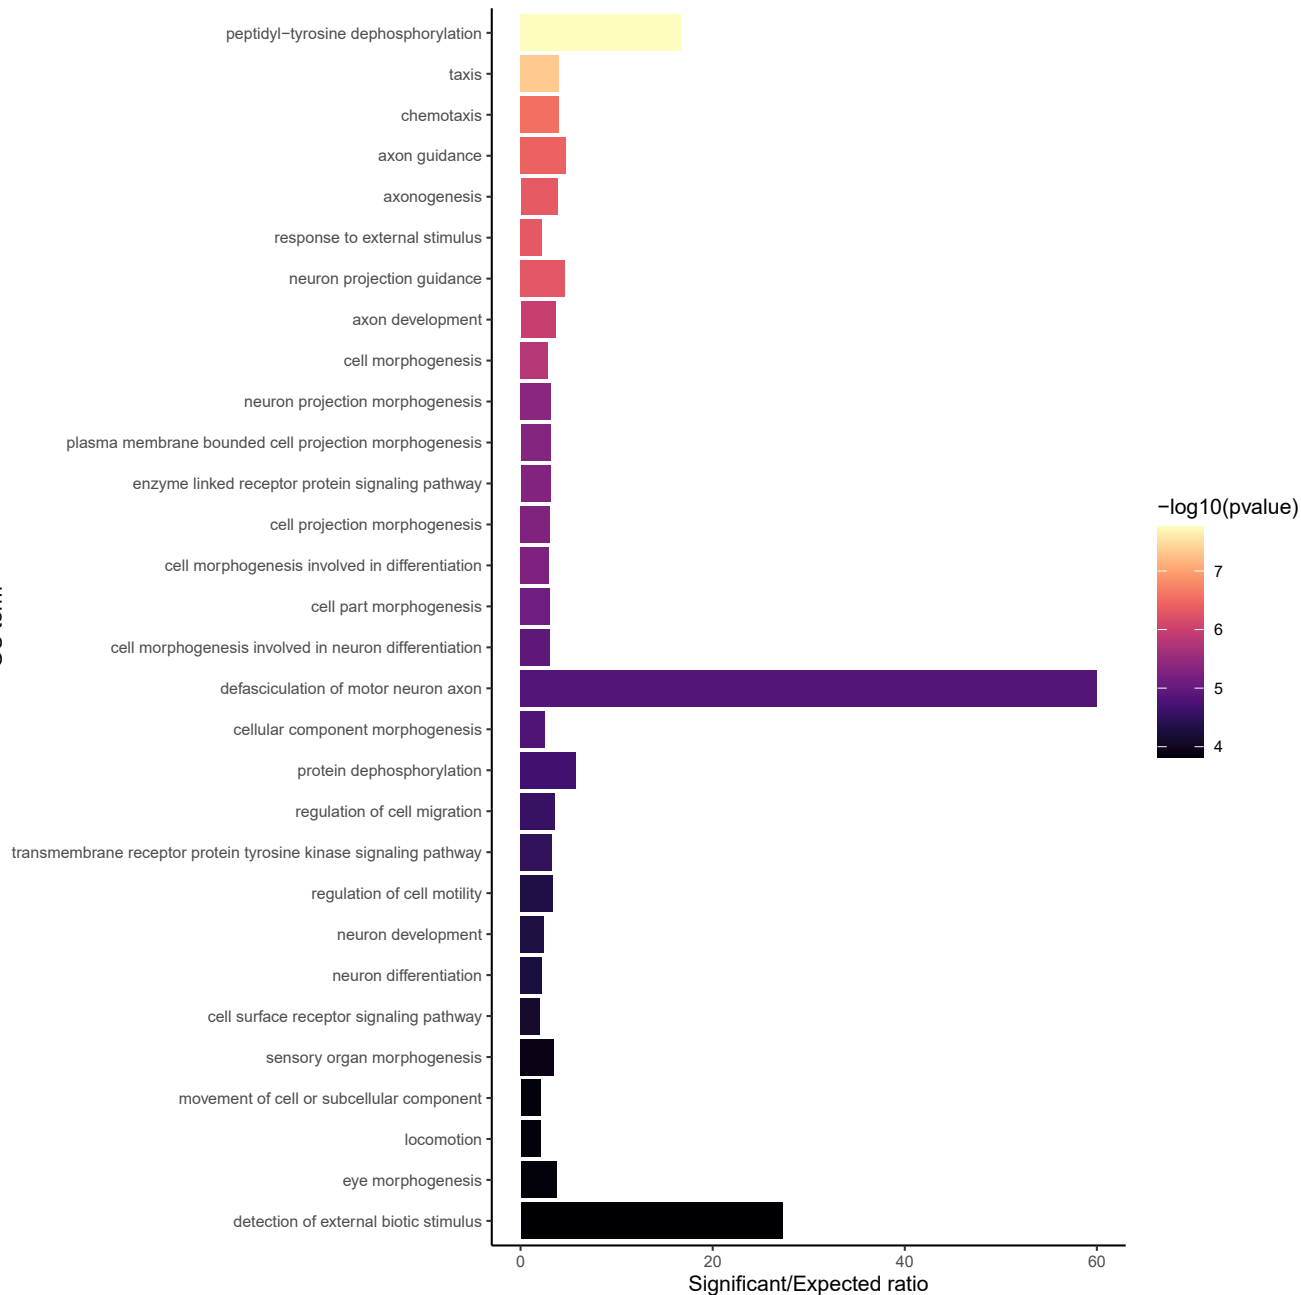

# Module Cpi1+ (midnightblue)

GO term

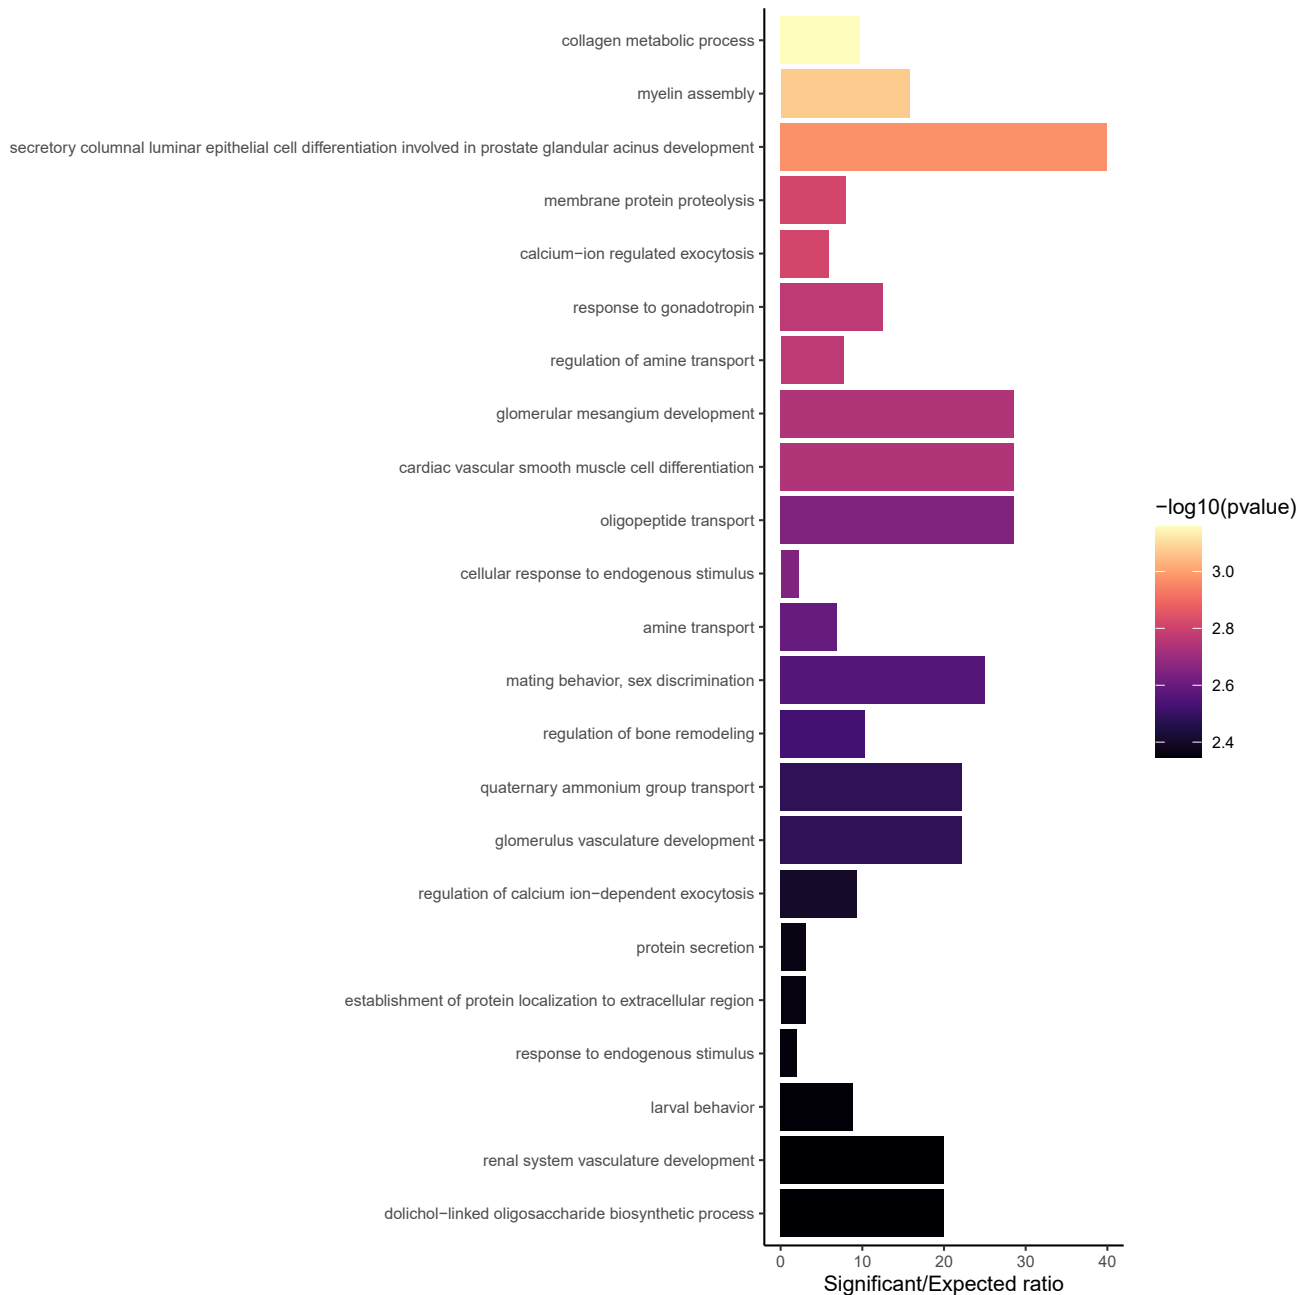

# Module Broad Epithelial 3 (orange)

GO term

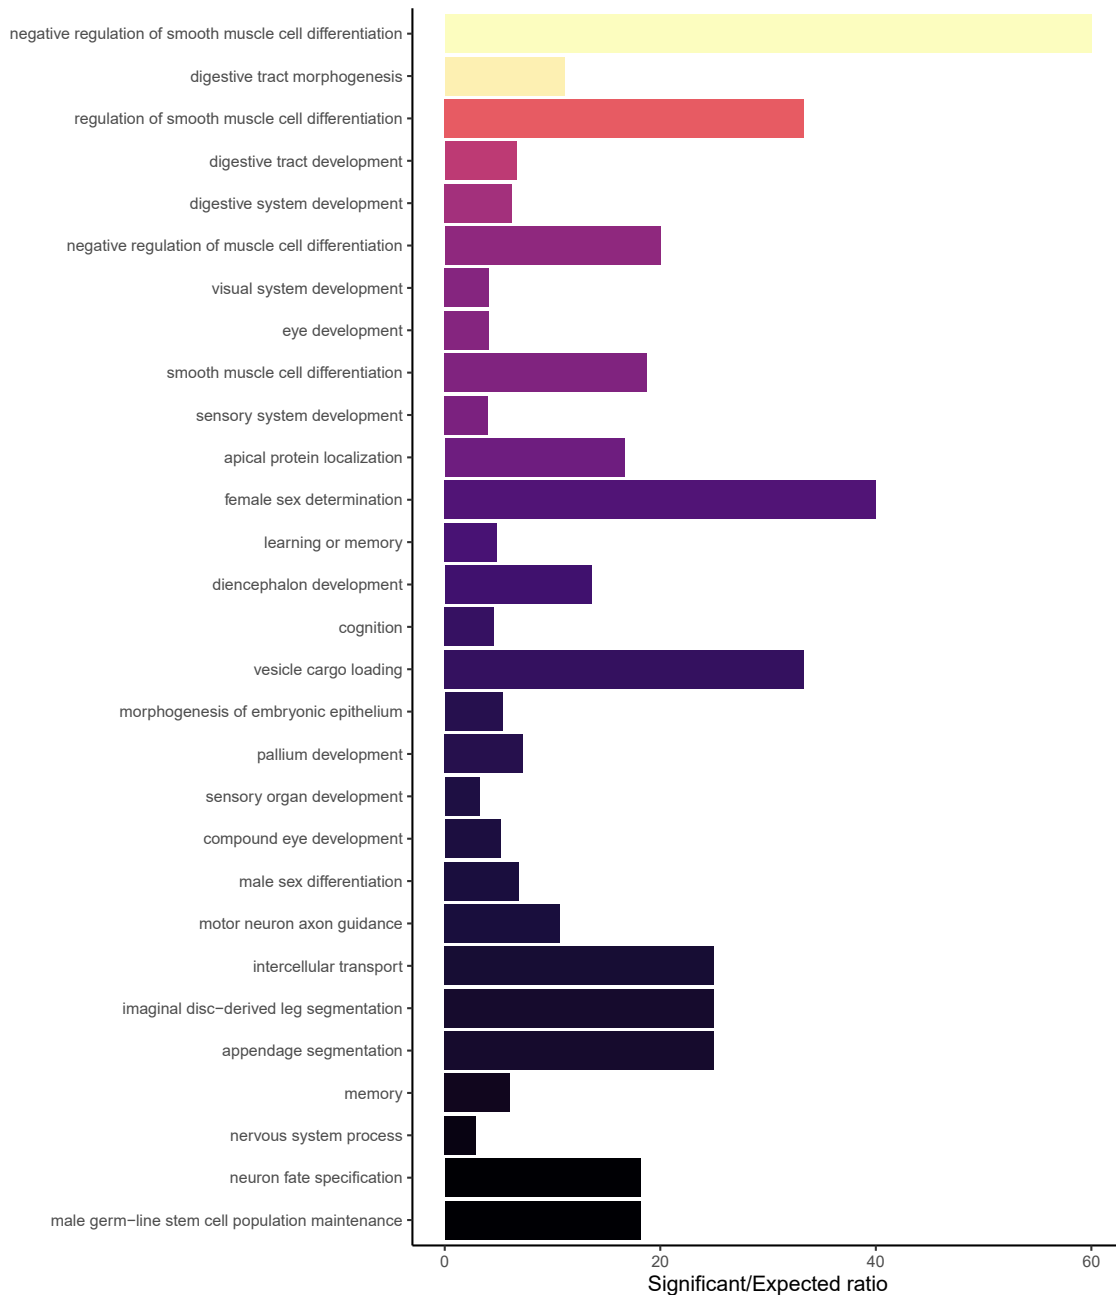

$-\log_{10}(\text{pvalue})$

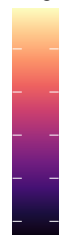

# Module Gland Chitinase 2+ (paleturquoise)

GO term

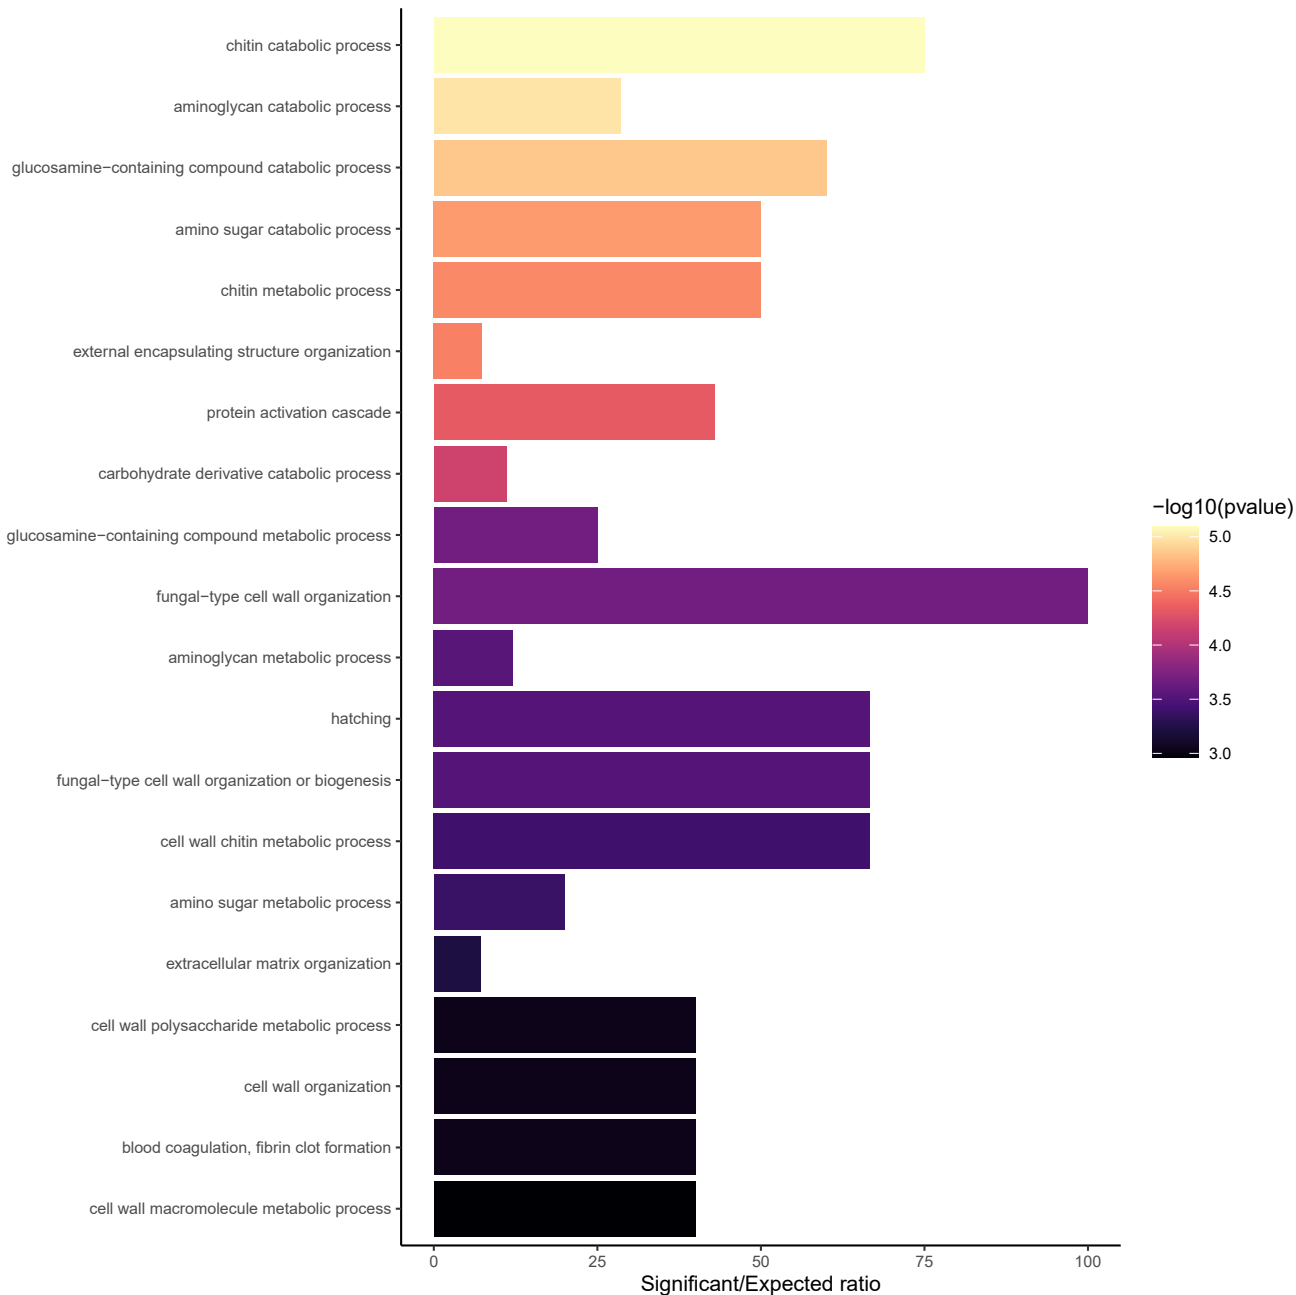

# Module Epithelial 5 (pink)

GO term

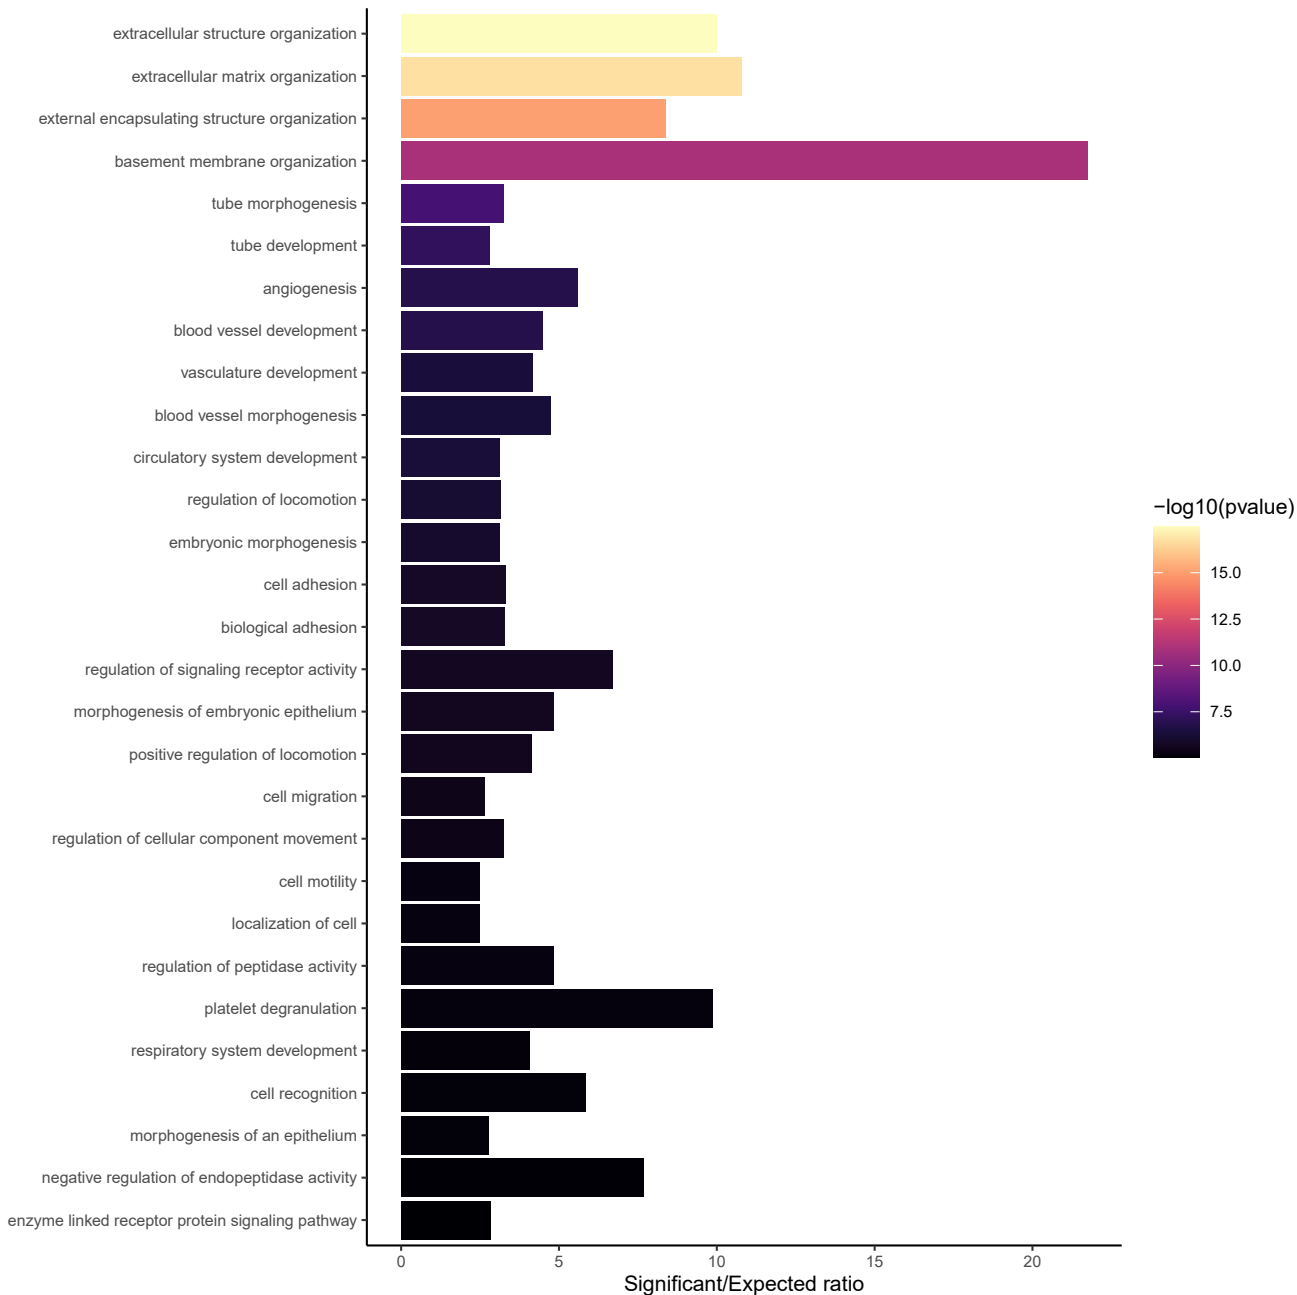

# Module Neuronal Inv+ (purple)

GO term

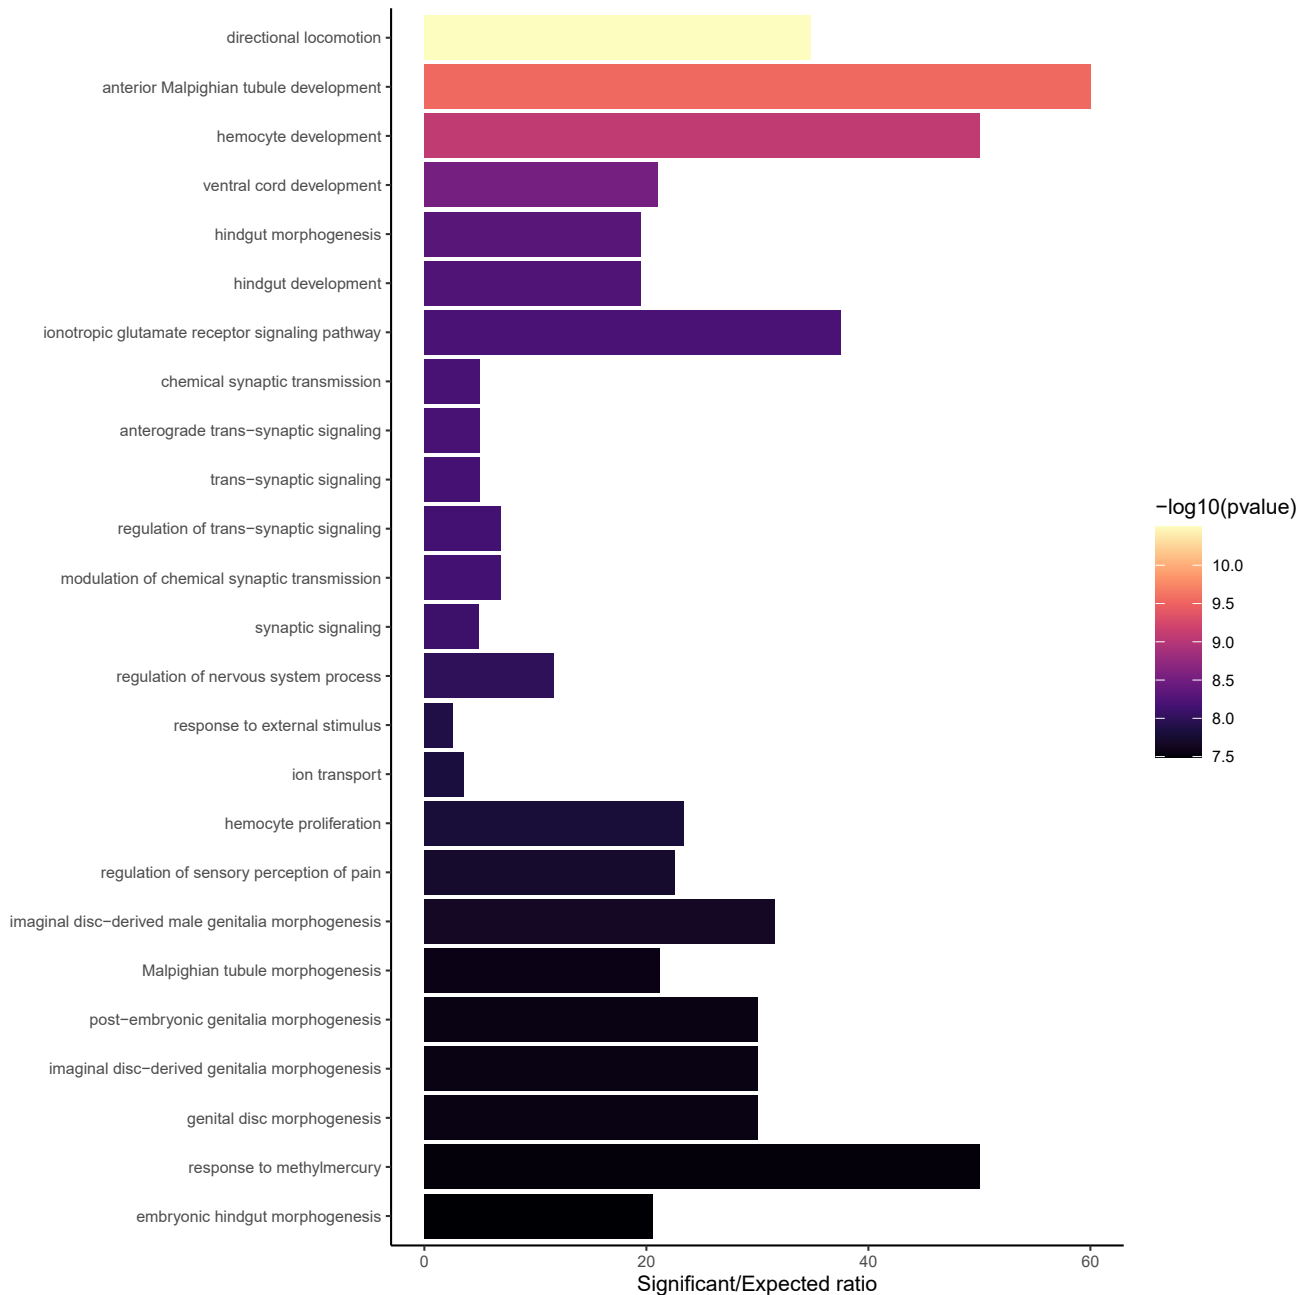

# Module Broad Epitheliomuscular 1 (red)

GO term

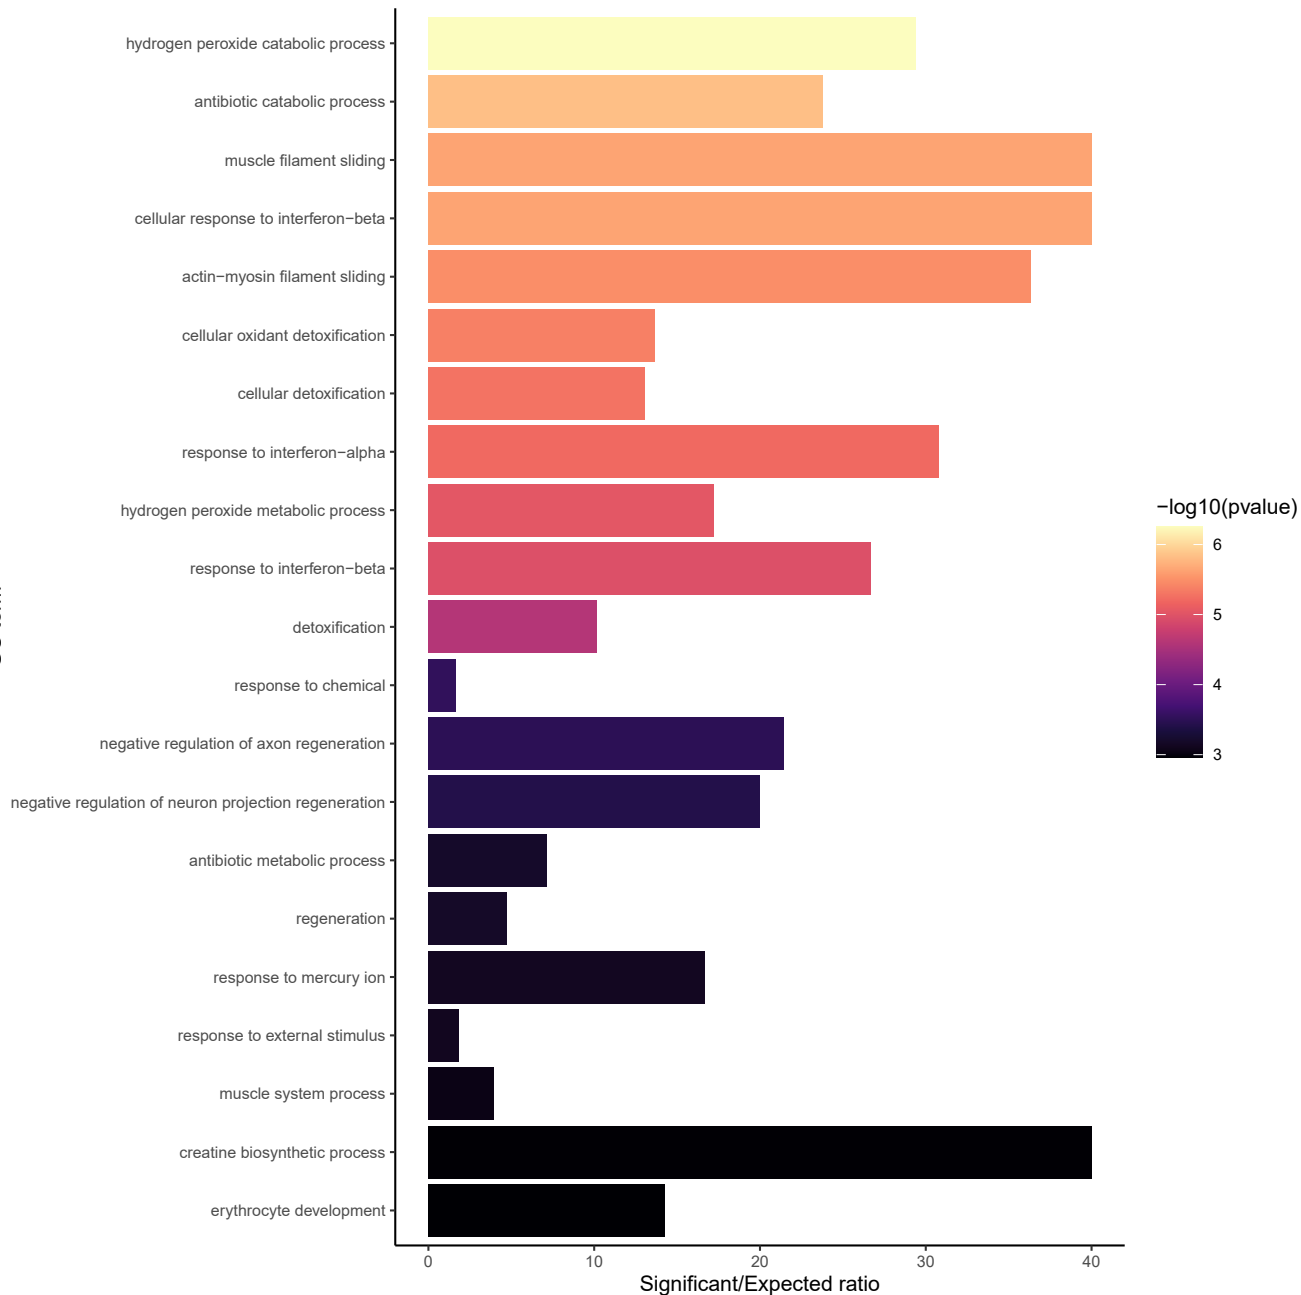

# Module Mixed Progenitors 1 (royalblue)

GO term

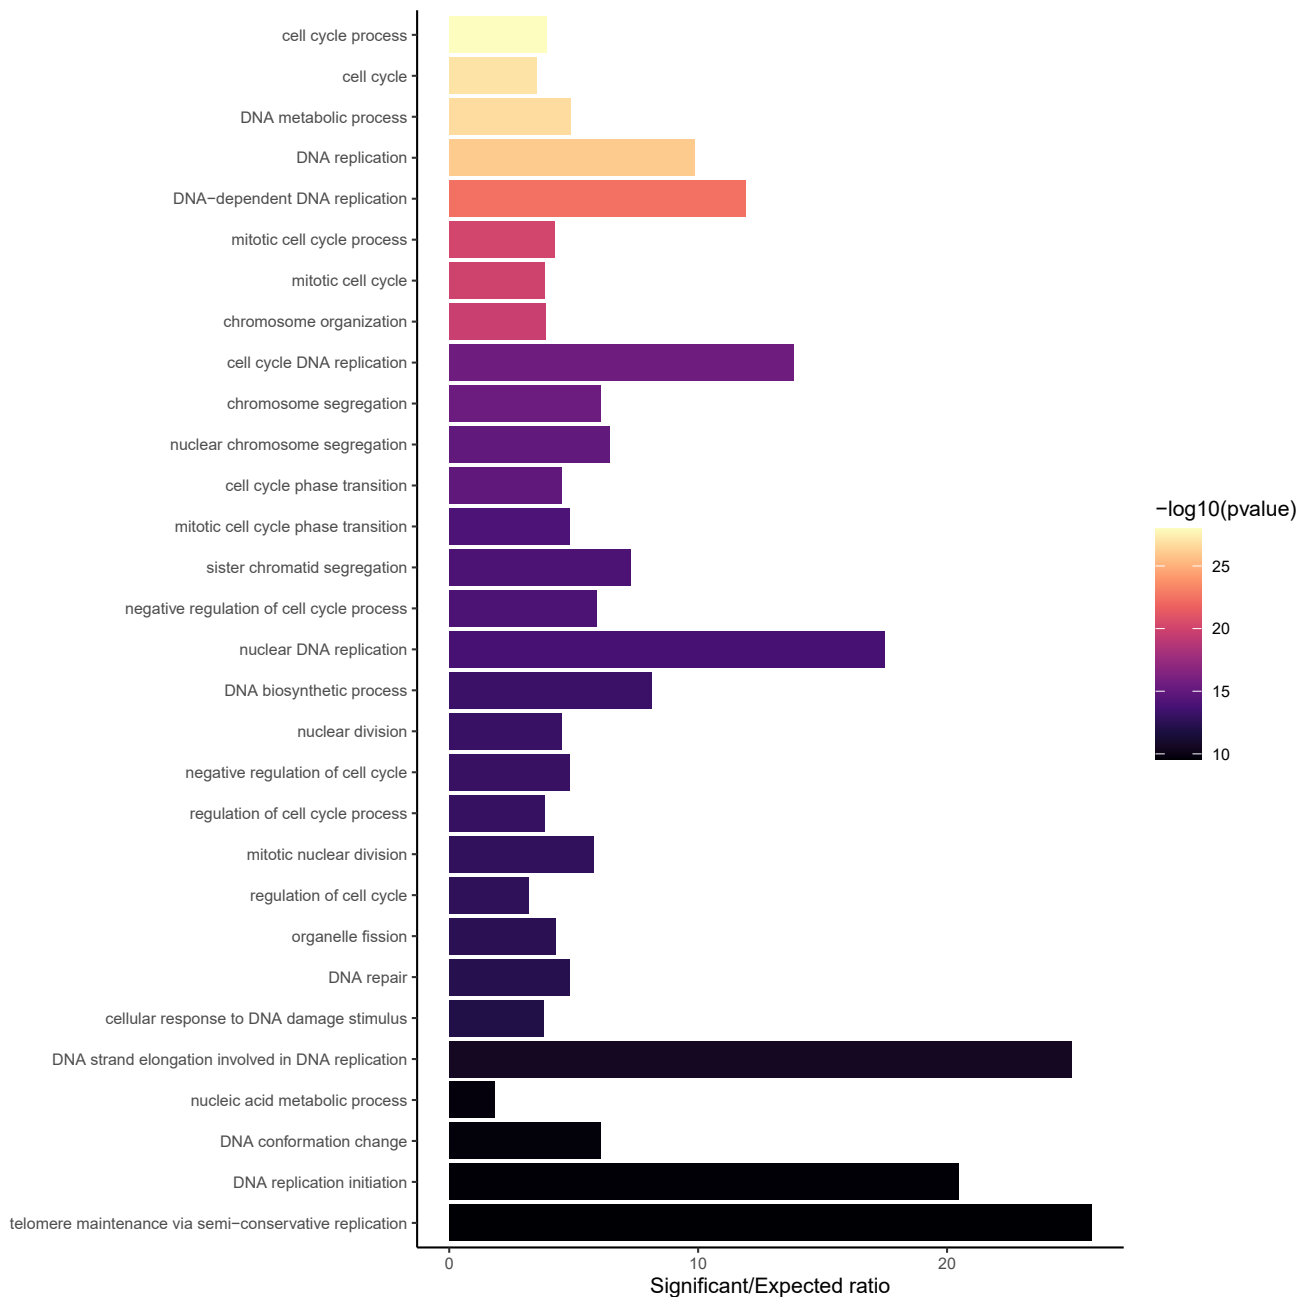

# Module Neuronal Rf+ (saddlebrown)

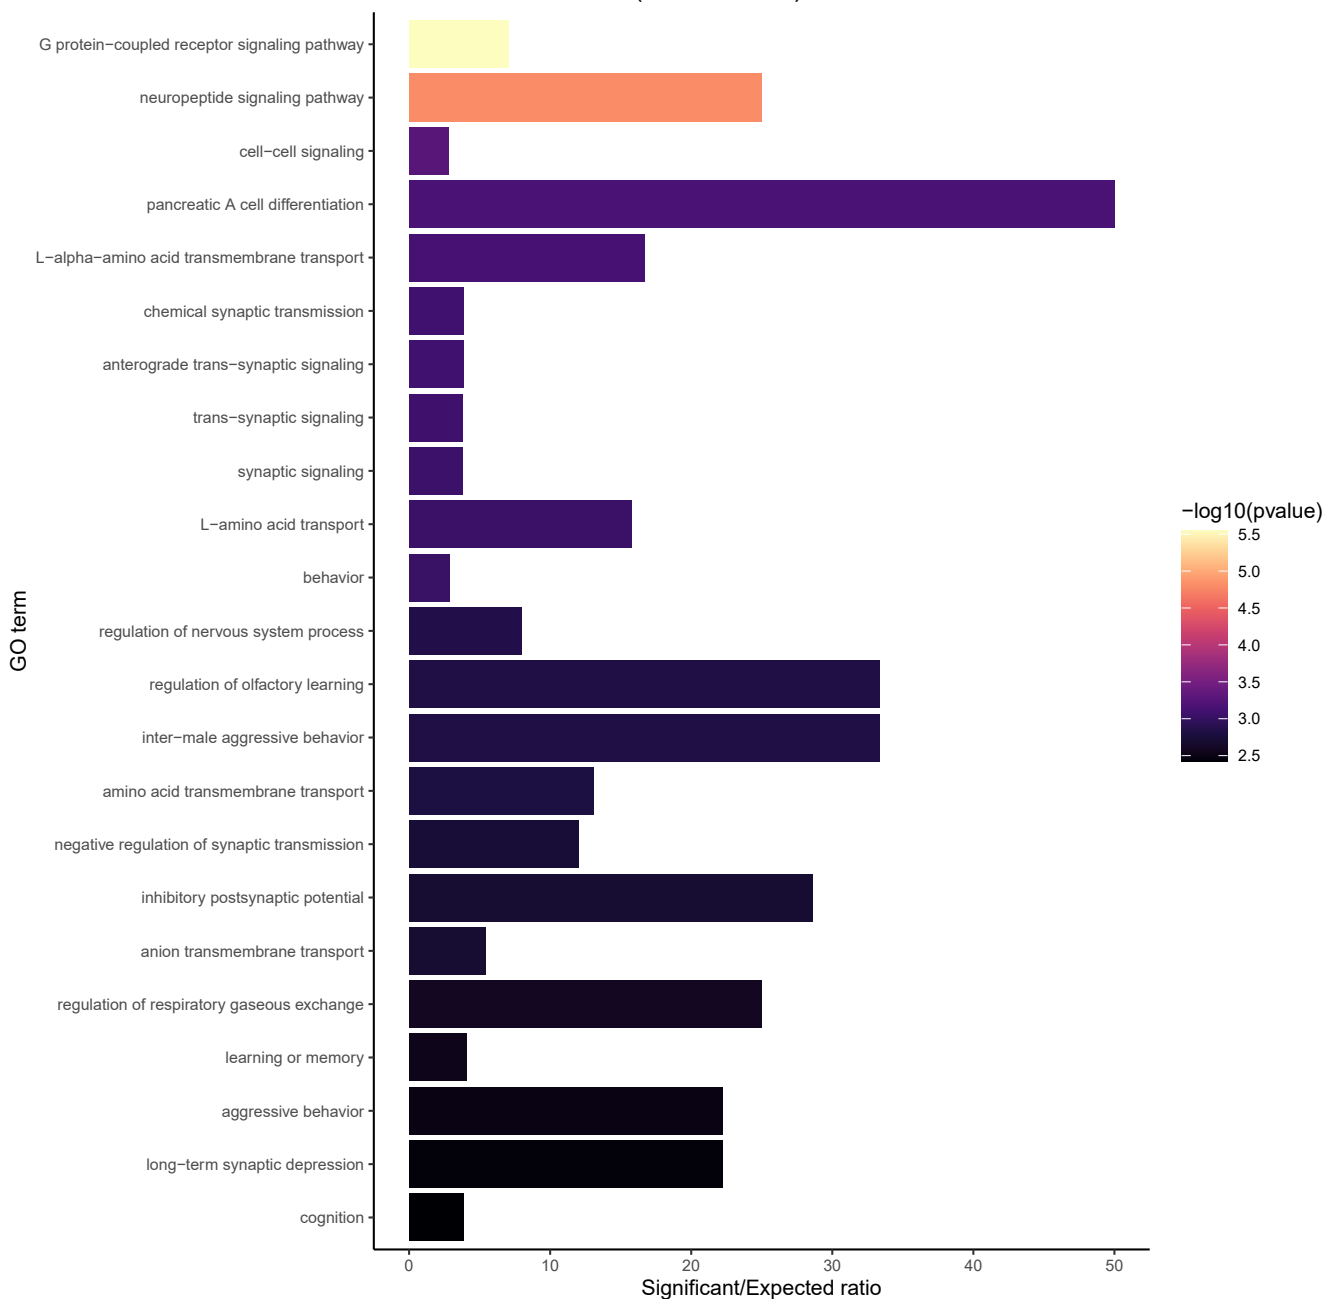

# Module Broad Neuronal 1 (salmon)

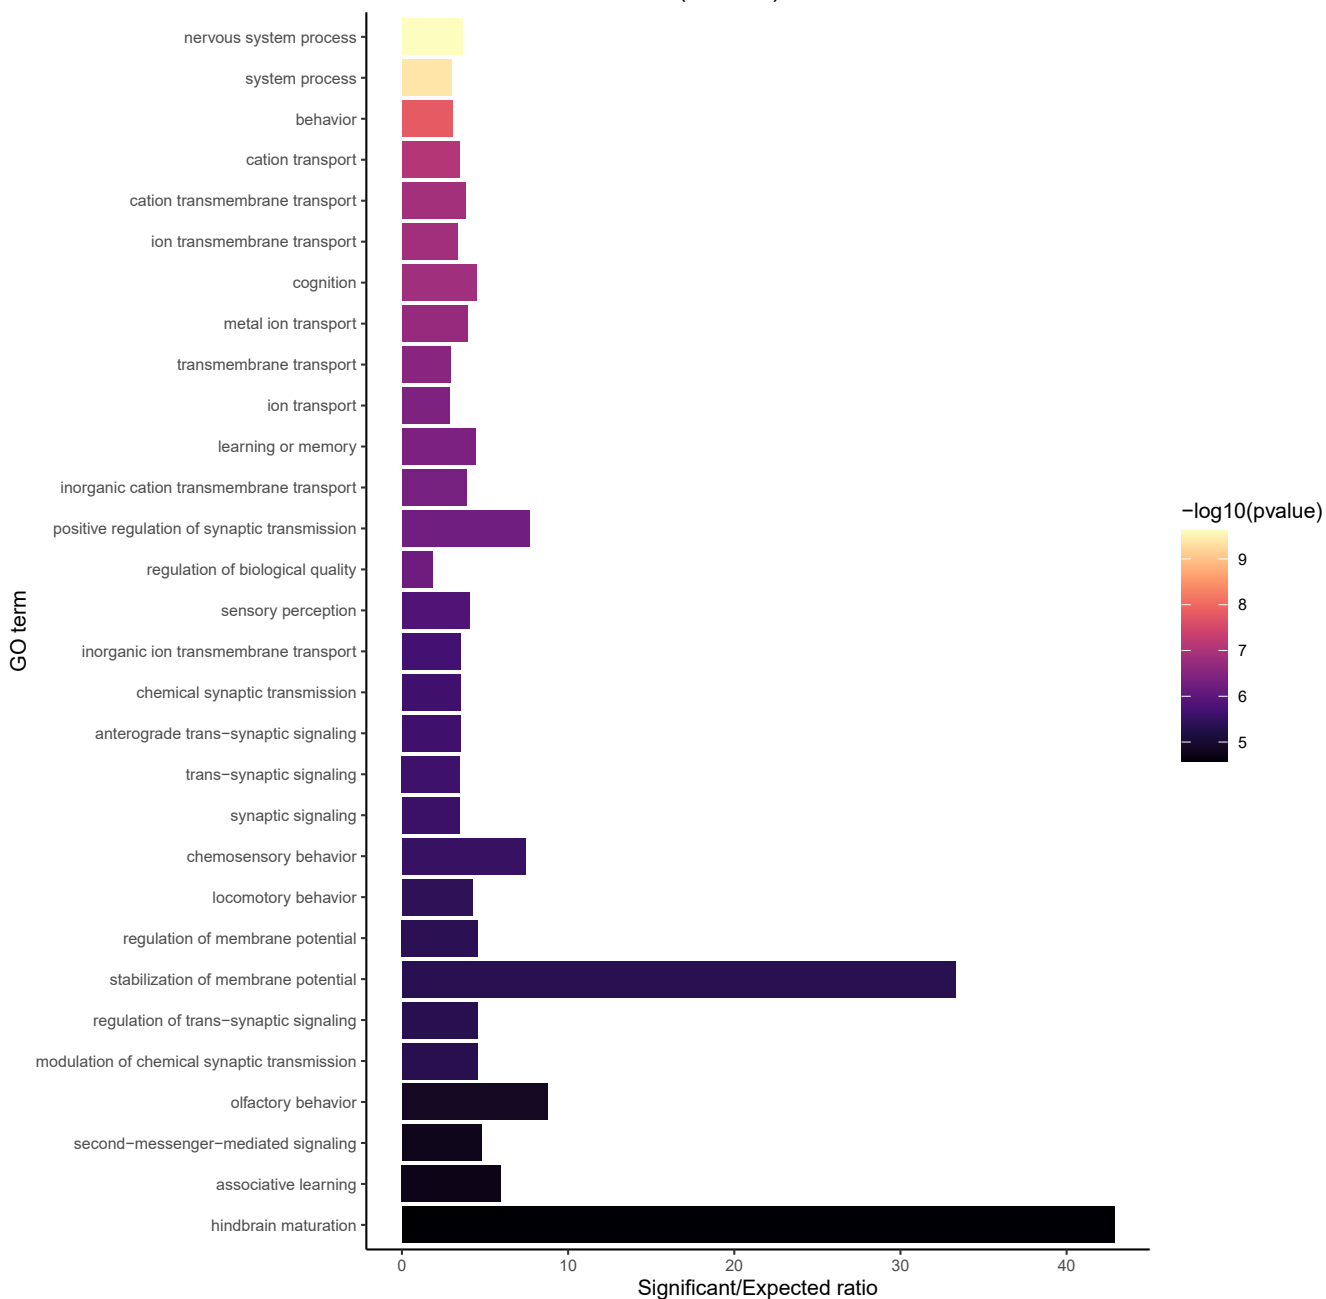

# Module Nematoblasts 1 (sienna3)

GO term

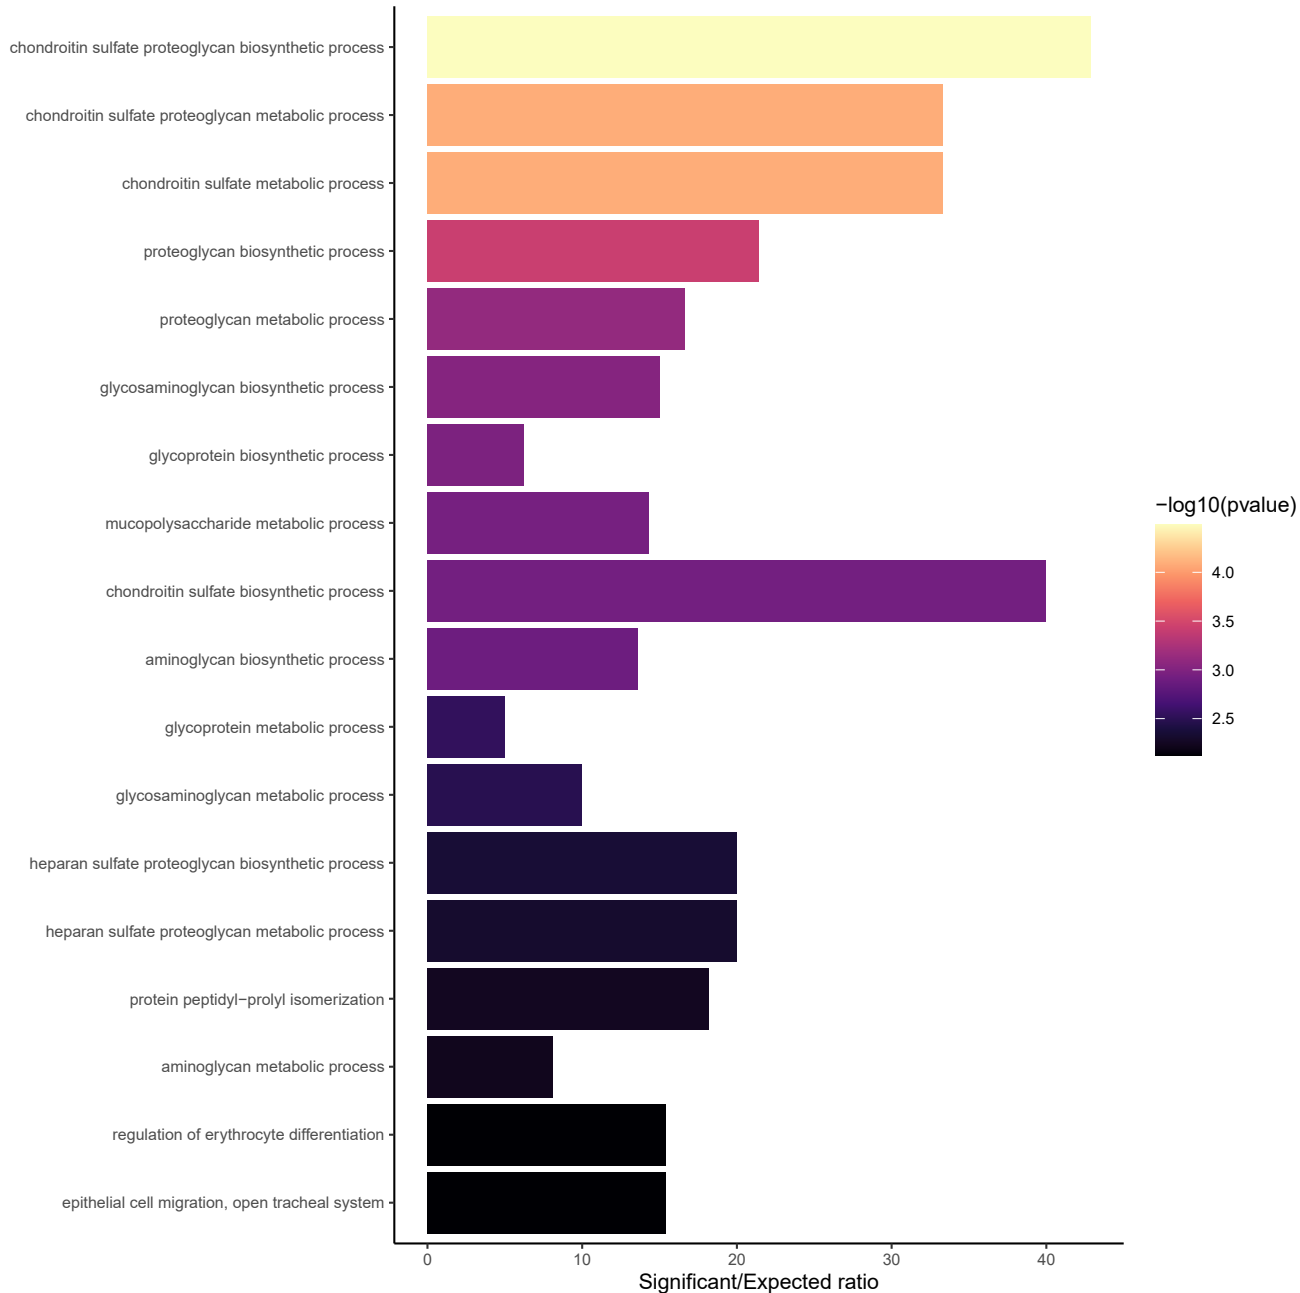

# Module Neuronal Fax+ (skyblue)

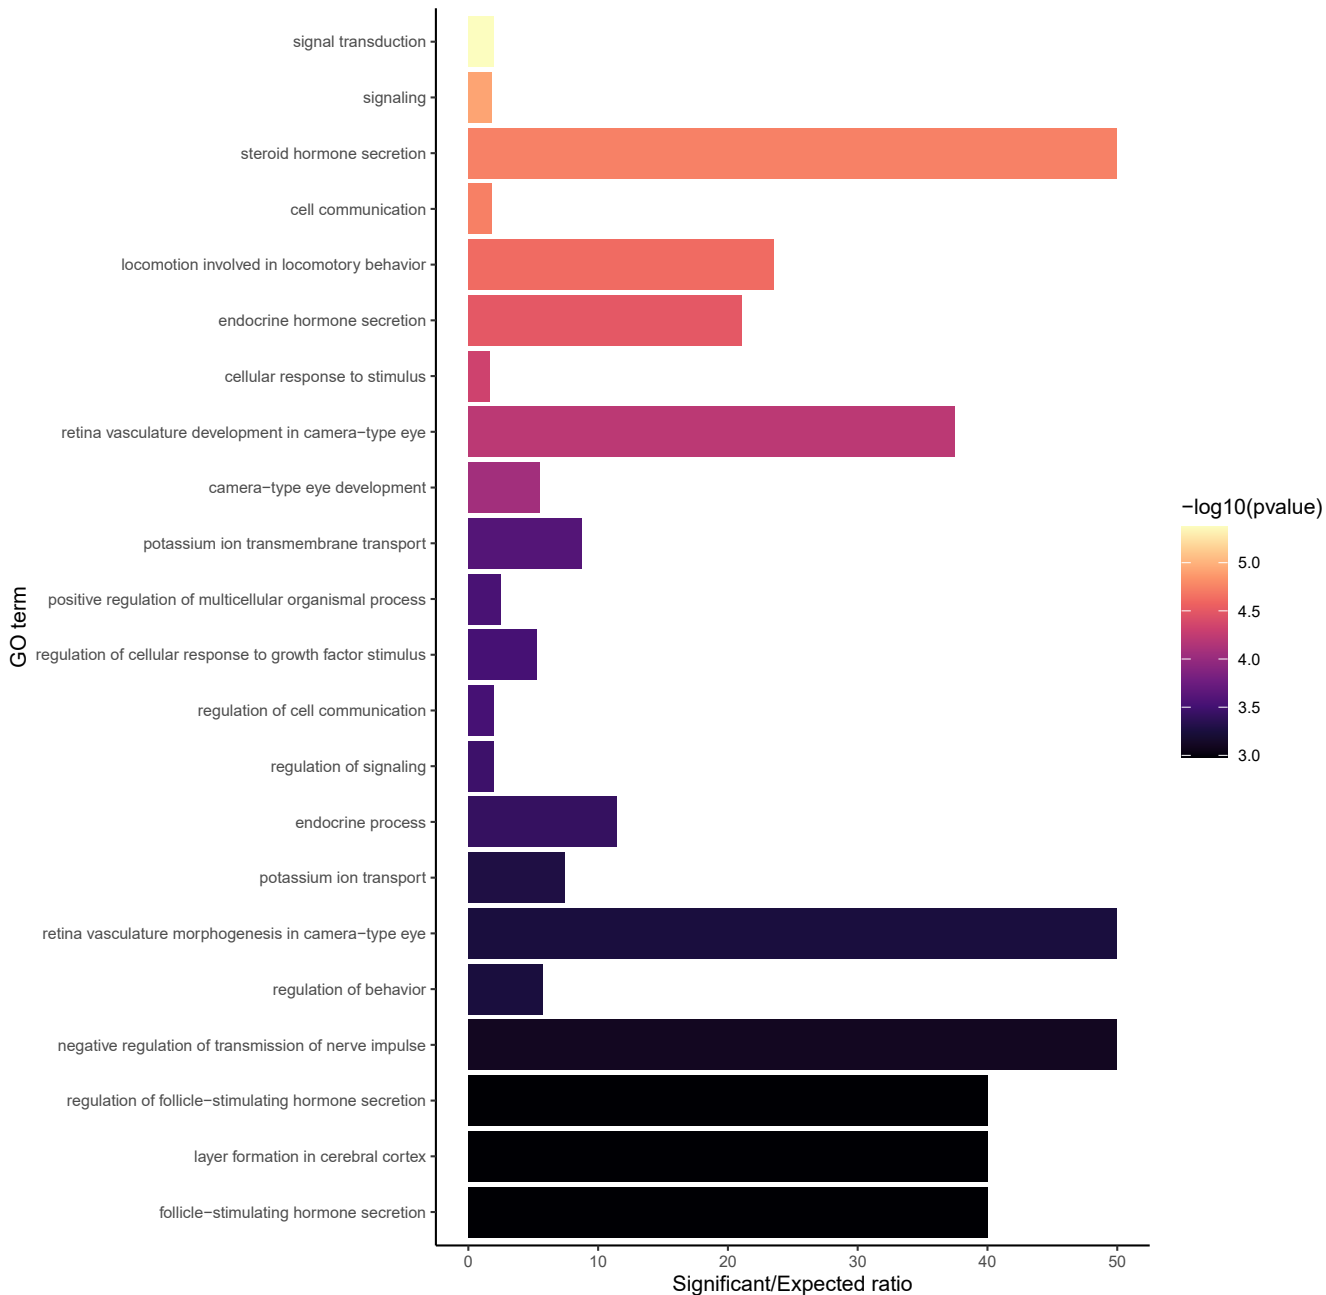

# Module Broad Nematoblasts 1 (skyblue3)

GO term

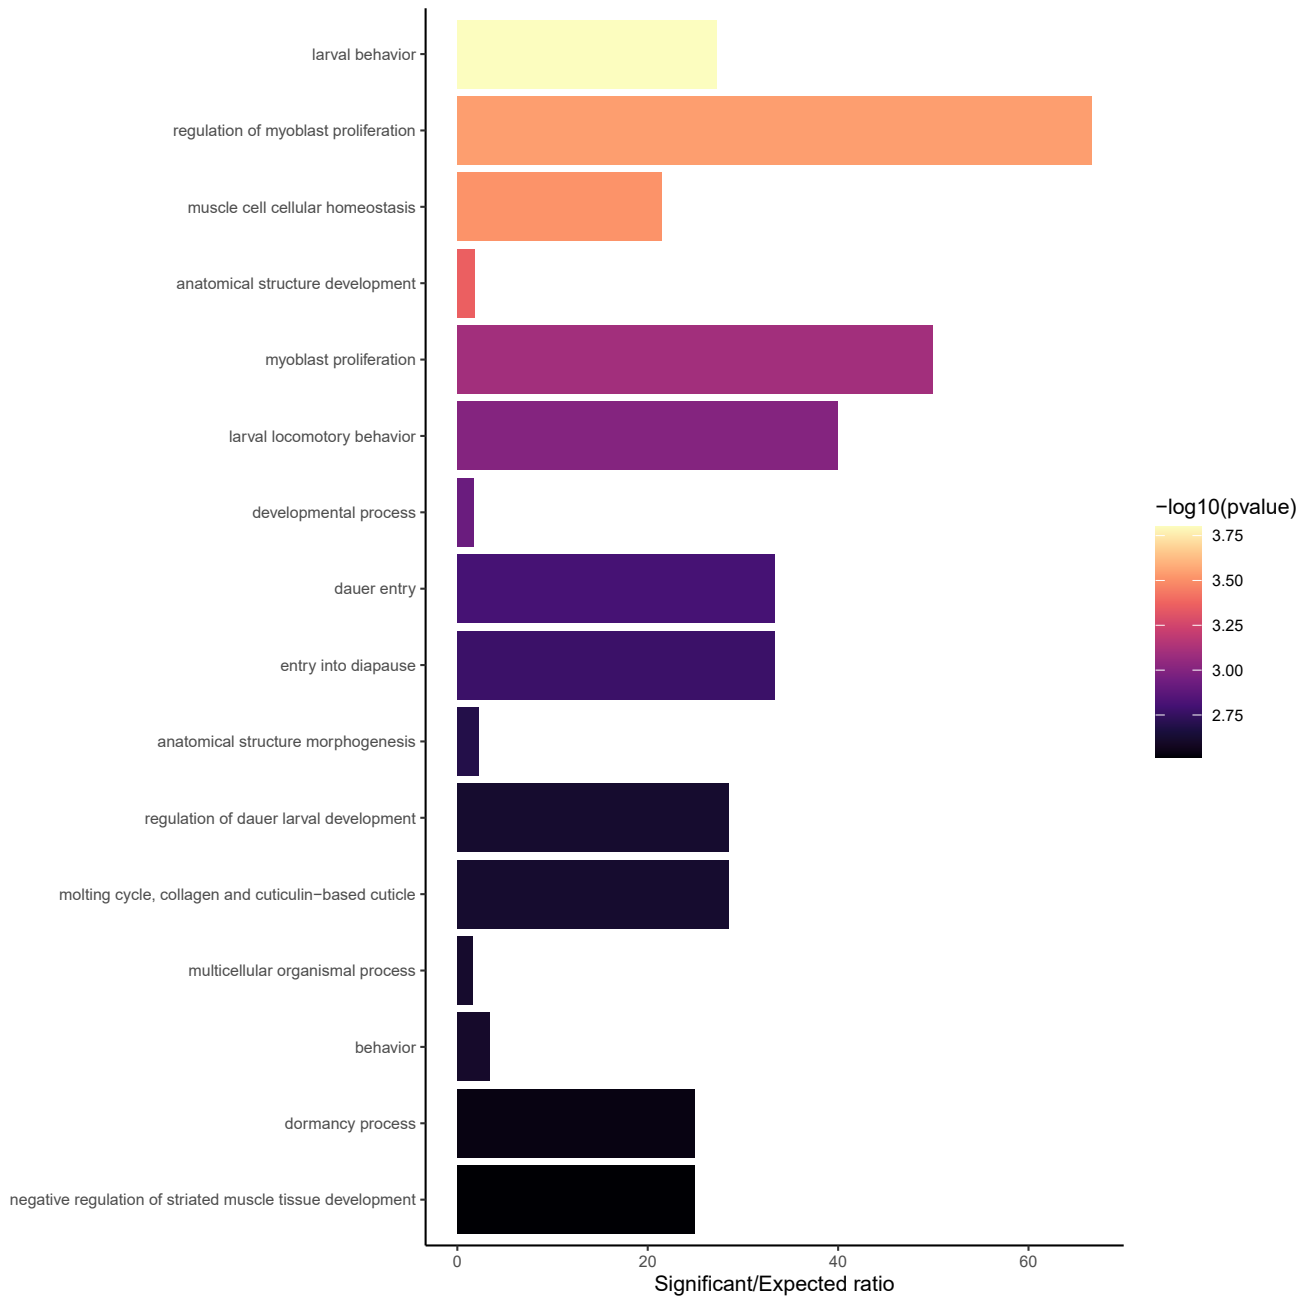

# Module Nematocyte Tchh2+ (steelblue)

GO term

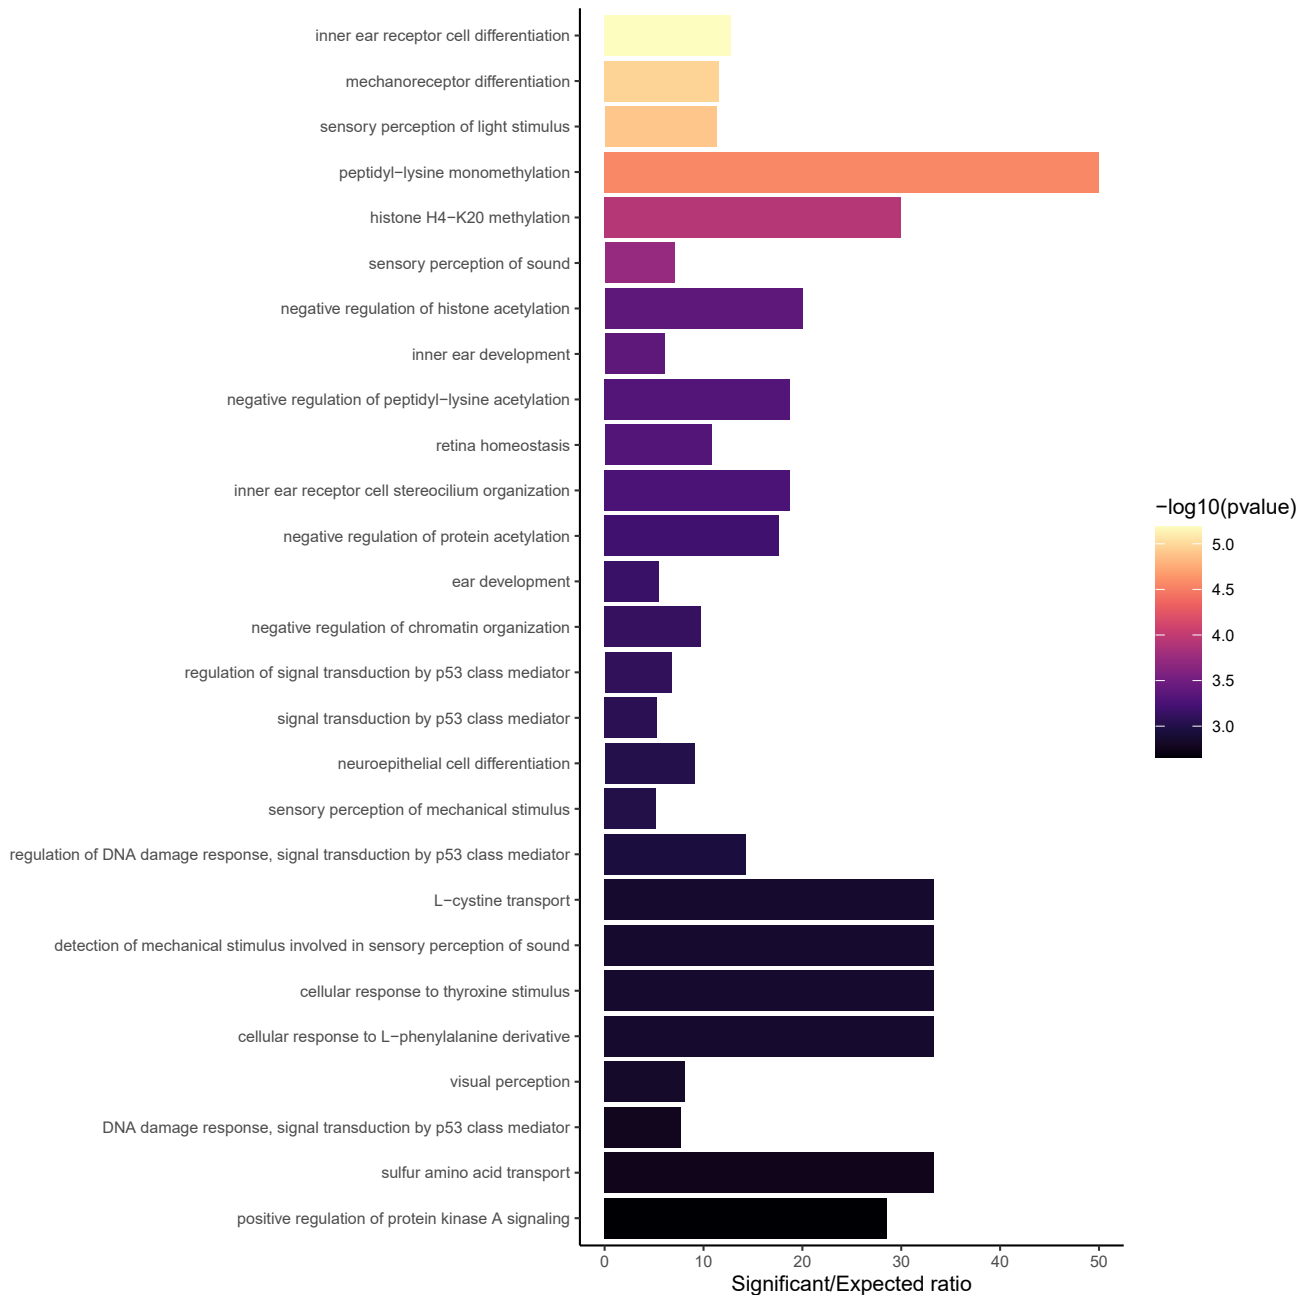

# Module Broad Epithelial 1 (tan)

GO term

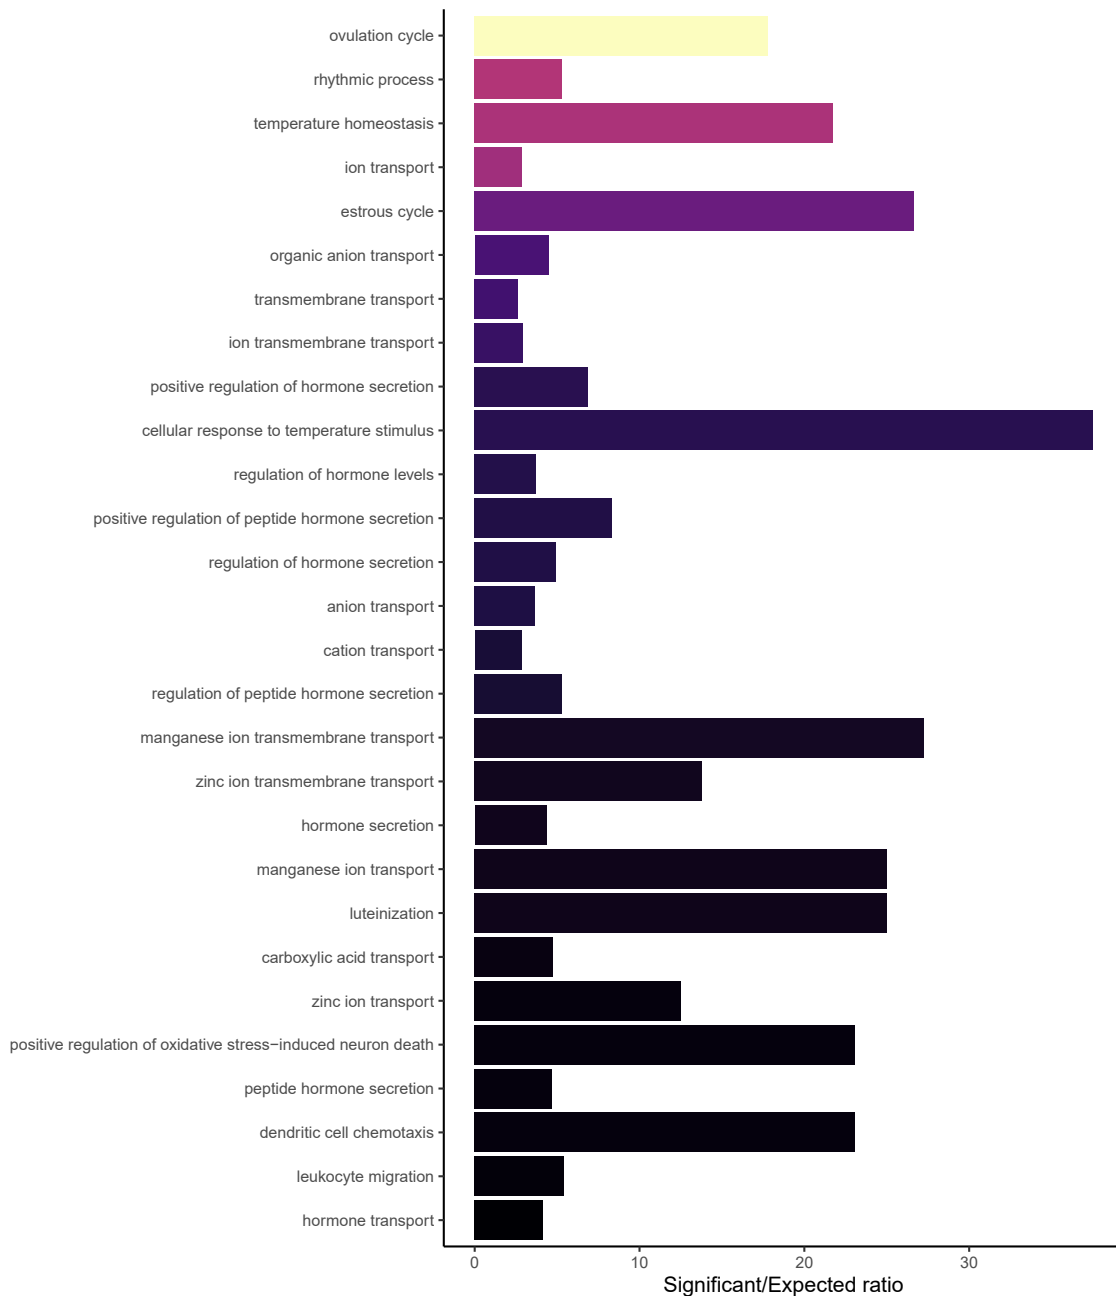

$-\log_{10}(\text{pvalue})$

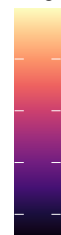

Significant/Expected ratio

# Module Nematocyte Tchh1+ (turquoise)

GO term

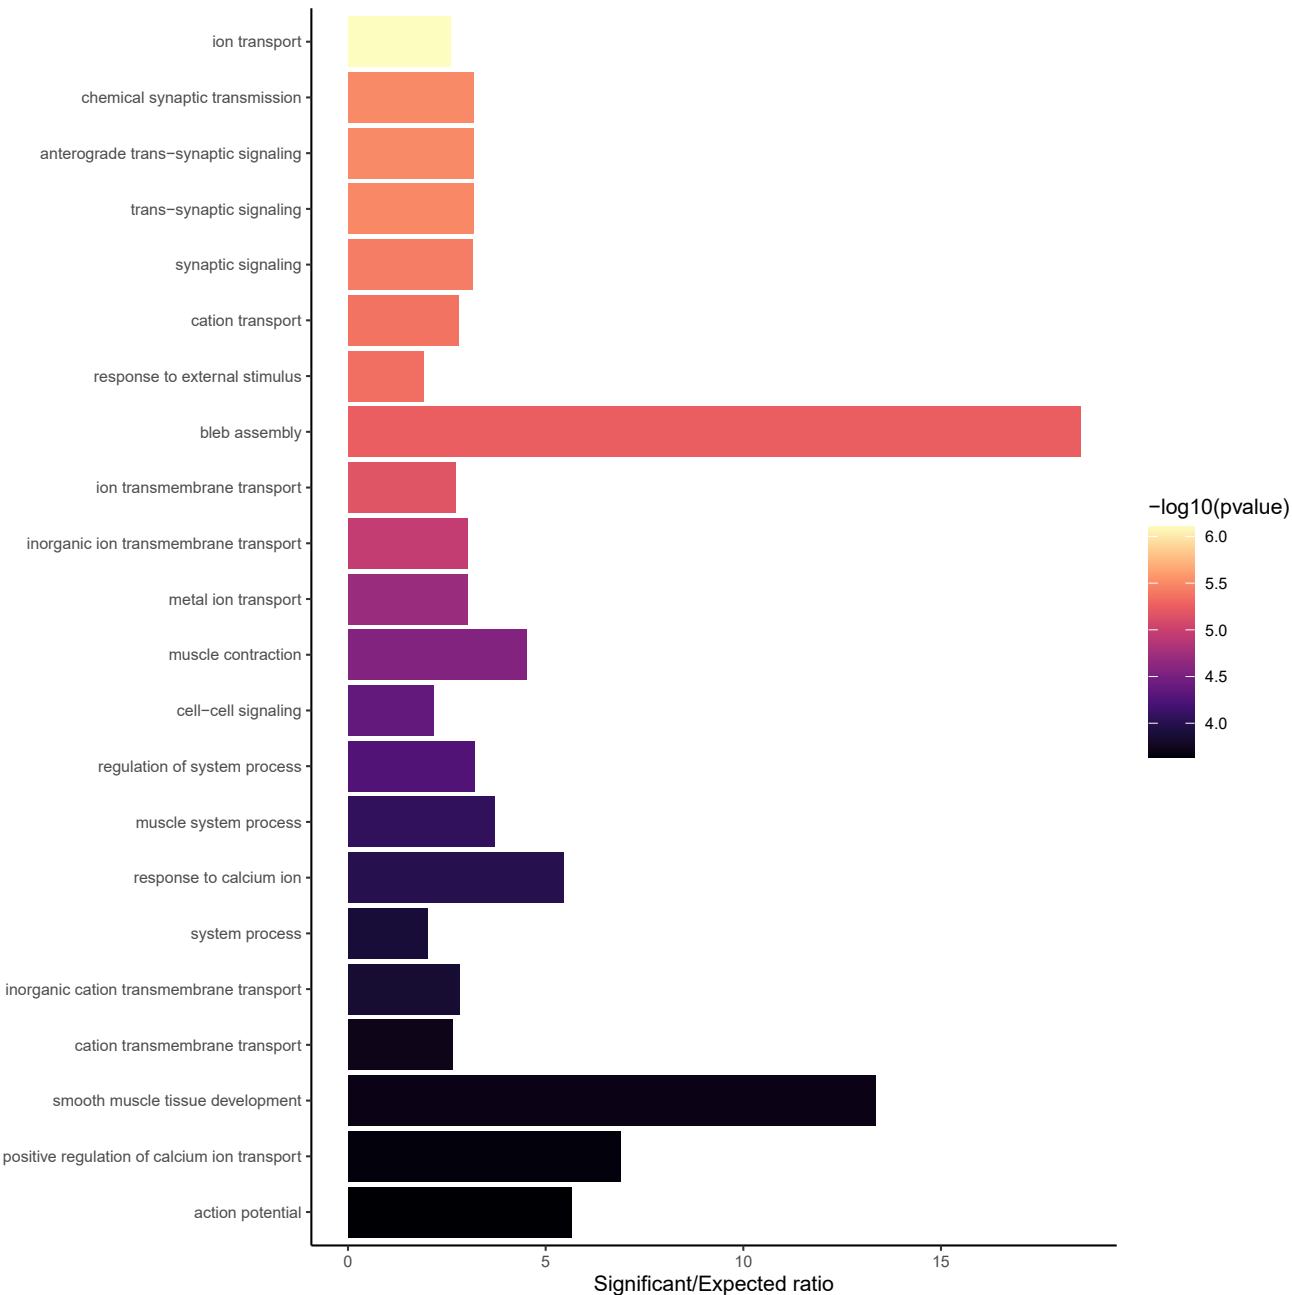

# Module Gland Nas14+ (violet)

GO term

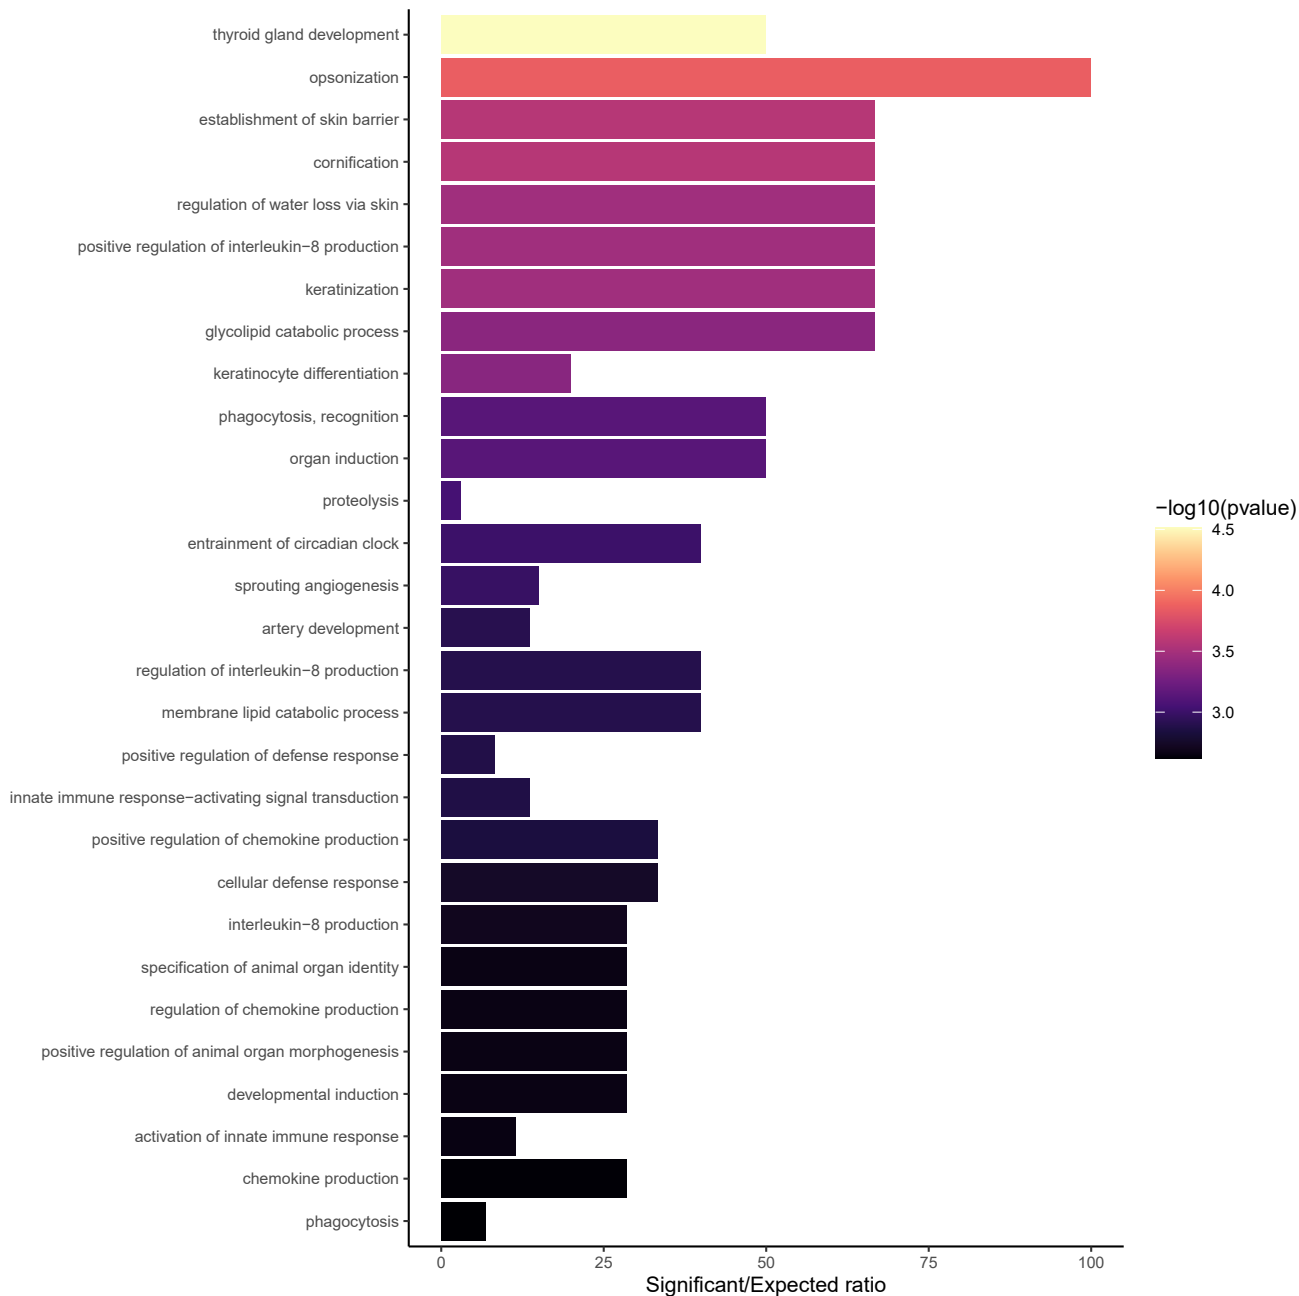

# Module Nematoblast 3 (white)

GO term

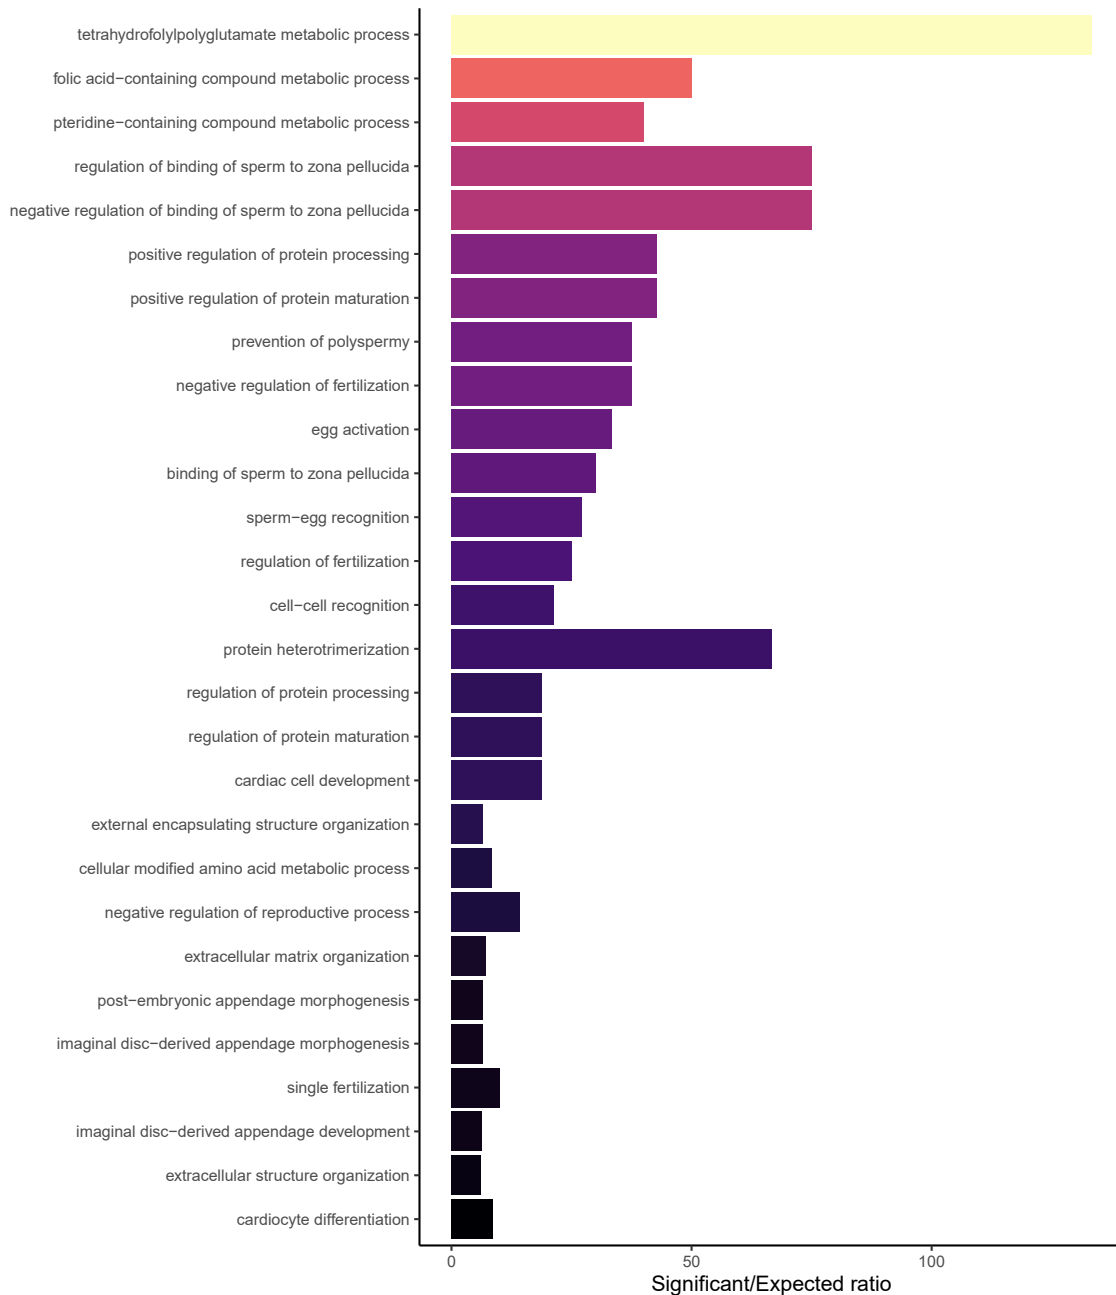

$-\log_{10}(\text{pvalue})$

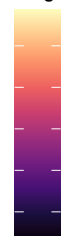

Significant/Expected ratio

# Module Epitheliomuscular 3 (yellow)

GO term

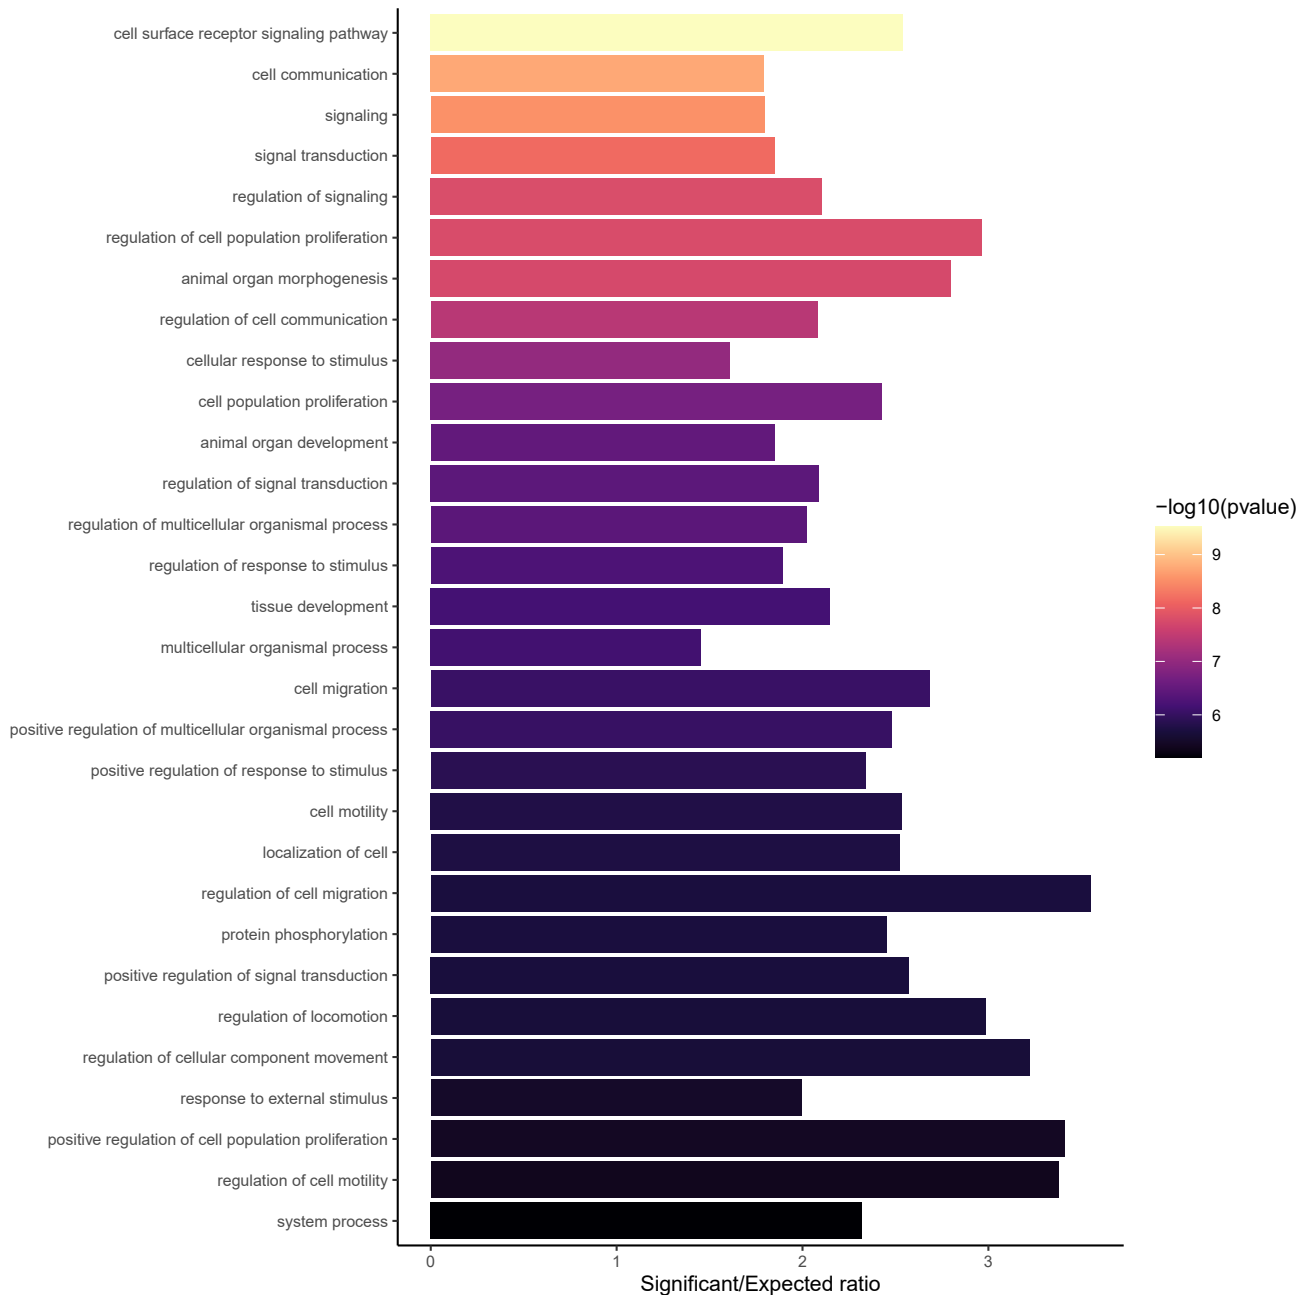

# Module Gland Nas4+ (yellowgreen)

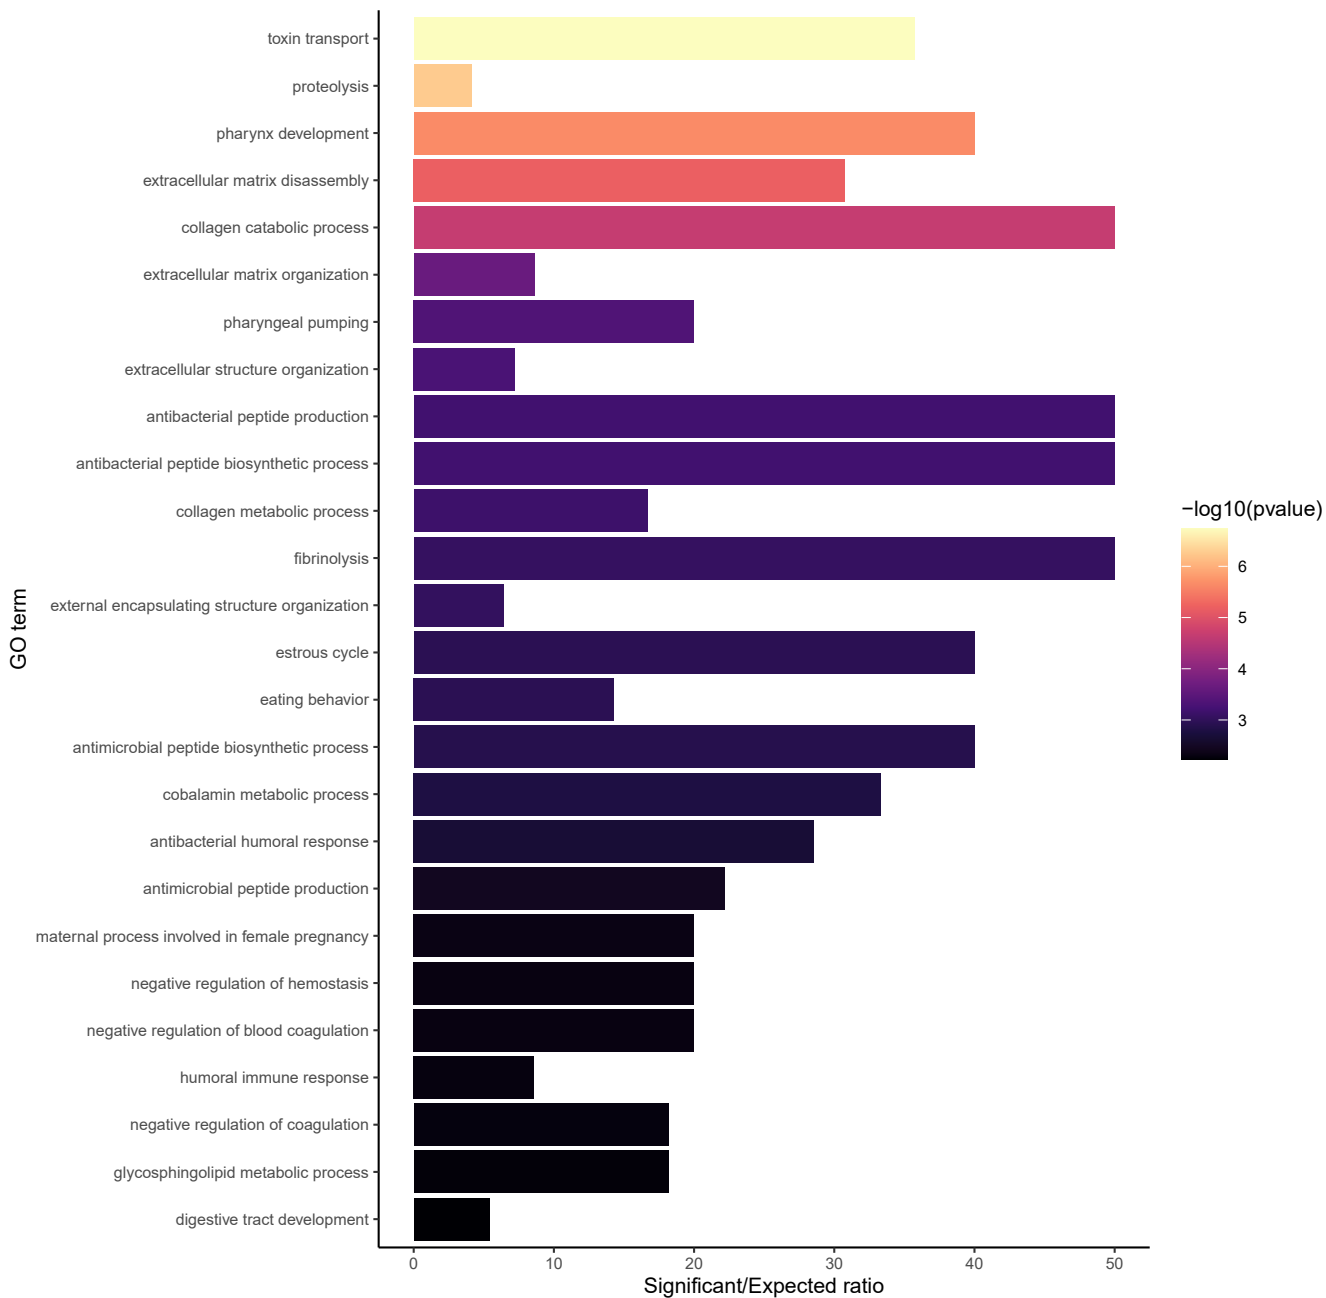

Supplement: MOESM11 [file 41467_2025_57168_MOESM11_ESM.pdf]
